# Supplementary material for: Juvenile murine models of prediabetes and type 2 diabetes develop neuropathy
Source: PubMed Central journal article supplement (PMC6307897; doi:10.1242/dmm.037374), 2018-12-18
Supplement: dmm-11-037374-s1.pdf [file dmm-11-037374-s1.pdf]

Table S1. Body Weight

| Group | Cage    | Mouse ID | Weight (g) |          |         |            |            |         |          |            |      |
|-------|---------|----------|------------|----------|---------|------------|------------|---------|----------|------------|------|
|       |         |          | 8wk        | 12wk     | 16wk    | 20wk       | 23wk       | 24wk    | 32wk     | 36wk       |      |
|       |         |          | 11.19.14   | 12.15.14 | 1.13.15 | 02.11.2015 | 03.02.2015 | 3.11.15 | 5.5.2015 | 05.29.2015 |      |
| SD    | AA      | A        | 19.16      | 23.88    | 26.0    | 28.05      | 28.0       | 30.03   | x        | 37.8       |      |
|       | AA      | B        | 27.27      | 32.04    | 35.0    | 26.57      | 38.0       | 36.72   | x        | x          |      |
|       | AA      | C        | 22.97      | 26.72    | 29.8    | 35.39      | 32.1       | 31.32   | x        | 38.3       |      |
|       | AA      | D        | 22.48      | 26.83    | 27.3    | 29.42      | 29.3       | 28.58   | x        | x          |      |
|       | AA      | F        | 22.09      | 24.82    | x       | 29.67      | 31.0       | 29.08   | x        | 34.1       |      |
|       | BB      | A        | 21.75      | 25.42    | 27.8    | 29.68      | 31.5       | 28.82   | x        | 30.6       |      |
|       | BB      | B        | 24.11      | 28.32    | 30.8    | 32.1       | 33.3       | 31.62   | x        | 39.6       |      |
|       | BB      | C        | 24.30      | 27.47    | 30.7    | 33.78      | 34.6       | 33.47   | x        | 40.3       |      |
|       | BB      | D        | 21.29      | 24.15    | 26.000  | 27.91      | 29.2       | 28.0    | x        | 33.8       |      |
|       | BB      | F        | 21.42      | 24.28    | x       | 27.43      | 29.2       | 28.67   | x        | 35.1       |      |
|       | CC      | A        | 29.44      | 40.36    | 49.5    | 39.61      | 43.0       | 41.74   | x        | 49.4       |      |
|       | CC      | C        | 23.11      | 28.09    | 32.7    | 50.51      | 50.9       | 49.61   | x        | 57.8       |      |
| CC    | E       | 24.57    | 30.06      | 35.1     | 50.31   | 51.6       | 49.49      | x       | 59.2     |            |      |
| DIO   | DD      | A        | 23.42      | 27.65    | 31.2    | 55.41      | 56.3       | 54.63   | x        | 64.3       |      |
|       | DD      | C        | 26.8       | 37.22    | 46.1    | 38.81      | 43.0       | 38.68   | x        | 51.4       |      |
|       | DD      | E        | 30.28      | 35.61    | 41.2    | 42.2       | 46.2       | 44.13   | x        | 51.0       |      |
|       | EE      | B        | 23.4       | 26.52    | 29.2    | 37.87      | 43.1       | 39.09   | x        | 50.8       |      |
|       | EE      | E        | 23.65      | 27.07    | 30.6    | 34.89      | 38.5       | 36.61   | x        | 46.9       |      |
|       | FF      | B        | 26.88      | 35.47    | x       | 51.58      | 51.2       | 51.5    | x        | 46.9       |      |
|       | FF      | E        | 24.82      | 30.65    | x       | 44.23      | 49.3       | 48.95   | x        | 55.5       |      |
|       | DIO-STZ | GG       | A          | 23.75    | 30.08   | 34.6       | 40.63      | 43.7    | 43.03    | 50.2       | 54.8 |
|       |         | GG       | C          | 27.56    | 34.81   | 38.3       | 42.87      | 45.3    | 43.32    | 54         | 57.5 |
|       |         | GG       | E          | 23.61    | 28.19   | 29.6       | 34.26      | 35.9    | 36.30    | 35.1       | 43.2 |
|       |         | HH       | A          | 28.5     | 39.98   | 42.6       | 47.64      | 50.0    | 43.03    | x          | x    |
|       |         | HH       | C          | 26.08    | 36.85   | 39.5       | 44.43      | 45.7    | 43.65    | 52.3       | 56.0 |
| HH    |         | D        | 26.19      | 36.38    | 39.8    | 45.27      | 45.7       | 45.59   | 50       | 53.0       |      |
| II    |         | B        | 27.55      | 36.2     | 36.2    | 40.81      | 43.4       | 42.14   | 53       | 53.8       |      |
| II    |         | E        | 24.57      | 32.14    | 33.7    | 38.35      | 41.2       | 40.41   | 50.8     | 53.3       |      |
| JJ    |         | B        | 23.85      | 29.9     | x       | 41.27      | 42.8       | 41.65   | 53.3     | 57.0       |      |
| JJ    |         | E        | 24.09      | 29.58    | x       | 37.27      | 38.5       | 38.3    | 44.5     | 47.4       |      |

| Tukey's multiple comparisons test | Mean Diff. | 95.00% CI of diff. | Significant? | Summary |
|-----------------------------------|------------|--------------------|--------------|---------|
| 8wk                               |            |                    |              |         |
| SD vs. HF                         | -2.953     | -7.513 to 1.607    | No           | ns      |
| SD vs. HF-STZ                     | -2.891     | -7.451 to 1.669    | No           | ns      |
| HF vs. HF-STZ                     | 0.062      | -4.498 to 4.622    | No           | ns      |
| 12wk                              |            |                    |              |         |
| SD vs. HF                         | -5.477     | -10.04 to -0.9173  | Yes          | *       |
| SD vs. HF-STZ                     | -7.018     | -11.58 to -2.458   | Yes          | **      |
| HF vs. HF-STZ                     | -1.541     | -6.101 to 3.019    | No           | ns      |
| 16wk                              |            |                    |              |         |
| SD vs. HF                         | -7.775     | -12.87 to -2.677   | Yes          | **      |
| SD vs. HF-STZ                     | -7.613     | -12.71 to -2.515   | Yes          | **      |
| HF vs. HF-STZ                     | 0.1625     | -4.935 to 5.26     | No           | ns      |
| 20wk                              |            |                    |              |         |
| SD vs. HF                         | -14.54     | -19.1 to -9.982    | Yes          | ****    |
| SD vs. HF-STZ                     | -11.28     | -15.84 to -6.72    | Yes          | ****    |
| HF vs. HF-STZ                     | 3.262      | -1.298 to 7.822    | No           | ns      |
| 24wk                              |            |                    |              |         |
| SD vs. HF                         | -15.69     | -20.25 to -11.13   | Yes          | ****    |
| SD vs. HF-STZ                     | -11.6      | -16.16 to -7.04    | Yes          | ****    |
| HF vs. HF-STZ                     | 4.09       | -0.4697 to 8.65    | No           | ns      |
| 36wk                              |            |                    |              |         |
| SD vs. HF                         | -17.12     | -21.96 to -12.28   | Yes          | ****    |
| SD vs. HF-STZ                     | -16.69     | -21.64 to -11.73   | Yes          | ****    |
| HF vs. HF-STZ                     | 0.4311     | -4.253 to 5.116    | No           | ns      |

|         | Age (wk)      | 8     | 12    | 16    | 20    | 23    | 24    | 32    | 36    |
|---------|---------------|-------|-------|-------|-------|-------|-------|-------|-------|
| Ctrl    | Average (g)   | 22.7  | 26.4  | 29.2  | 30.0  | 31.6  | 30.6  | x     | 36.2  |
|         | StDev         | 2.2   | 2.5   | 3.0   | 2.9   | 3.0   | 2.7   | x     | 3.3   |
|         | n             | 10    | 10    | 8     | 10    | 10    | 10    | x     | 8     |
|         | StError       | 0.691 | 0.791 | 1.076 | 0.912 | 0.962 | 0.867 | x     | 1.181 |
|         | Max threshold | 27.05 | 31.39 | 35.26 | 35.77 | 37.70 | 36.11 | x     | 42.90 |
|         | Min threshold | 18.31 | 21.39 | 23.09 | 24.23 | 25.54 | 25.15 | x     | 29.54 |
| DIO     | Average (g)   | 25.6  | 31.9  | 37.0  | 44.5  | 47.3  | 45.4  | x     | 53.3  |
|         | StDev         | 2.6   | 4.9   | 7.7   | 7.0   | 5.4   | 6.2   | x     | 5.7   |
|         | n             | 10    | 10    | 8     | 10    | 10    | 10    | x     | 10    |
|         | StError       | 0.582 | 1.550 | 2.720 | 2.203 | 1.716 | 1.963 | x     | 1.801 |
|         | Max threshold | 30.84 | 41.67 | 52.33 | 58.48 | 58.16 | 57.86 | x     | 64.71 |
|         | Min threshold | 20.43 | 22.07 | 21.57 | 30.61 | 36.46 | 33.03 | x     | 41.93 |
| DIO-STZ | Average (g)   | 25.6  | 33.4  | 36.8  | 41.3  | 43.2  | 41.7  | 49.2  | 52.9  |
|         | StDev         | 1.8   | 4.0   | 4.1   | 4.0   | 4.0   | 2.7   | 6.0   | 4.7   |
|         | n             | 10    | 10    | 8     | 10    | 10    | 10    | 9     | 9     |
|         | StError       | 0.581 | 1.249 | 1.457 | 1.262 | 1.260 | 0.867 | 2.003 | 1.569 |
|         | Max threshold | 29.25 | 41.31 | 45.03 | 49.26 | 51.19 | 47.23 | 61.26 | 62.28 |
|         | Min threshold | 21.90 | 25.51 | 28.55 | 33.30 | 35.25 | 36.26 | 37.22 | 43.46 |

**Table S2. Fasting Glucose**

| Group   | Cage | Mouse ID | Fasting glucose (mg/dL) |            |            |            |            |            |
|---------|------|----------|-------------------------|------------|------------|------------|------------|------------|
|         |      |          | 12wk                    | 16wk       | 20wk       | 24wk       | 32wk       | 36wk       |
|         |      |          |                         | 01.14.2015 | 02.11.2015 | 03.02.2015 | 05.05.2015 | 05.29.2015 |
| SD      | AA   | A        |                         | 169        | 136        | 131        | x          | 225        |
|         | AA   | B        |                         | 278        | 202        | 172        | x          | x          |
|         | AA   | C        |                         | 248        | 213        | 165        | x          | 223        |
|         | AA   | D        |                         | 252        | 183        | 160        | x          | x          |
|         | AA   | F        |                         | x          | 192        | 86         | x          | 210        |
|         | BB   | A        |                         | 259        | 211        | 197        | x          | 155        |
|         | BB   | B        |                         | 231        | 225        | 249        | x          | 218        |
|         | BB   | C        |                         | 229        | 183        | 218        | x          | 201        |
|         | BB   | D        |                         | 244        | 149        | 228        | x          | 171        |
|         | BB   | F        |                         | x          | 218        | 234        | x          | 219        |
| DIO     | CC   | A        |                         | 402        | 251        | 309        | x          | 212        |
|         | CC   | C        |                         | 270        | 260        | 242        | x          | 244        |
|         | CC   | E        |                         | 259        | 258        | 283        | x          | 214        |
|         | DD   | A        |                         | 309        | 248        | 177        | x          | 221        |
|         | DD   | C        |                         | 405        | 299        | 241        | x          | 287        |
|         | DD   | E        |                         | 345        | 278        | 281        | x          | 273        |
|         | EE   | B        |                         | 193        | 218        | 276        | x          | 238        |
|         | EE   | C        |                         | 254        | 229        | 258        | x          | 270        |
|         | FF   | B        |                         | x          | 272        | 302        | x          | 154        |
|         | FF   | E        |                         | x          | 224        | 324        | x          | 222        |
| DIO-STZ | GG   | A        | STZ injection           | 477        | 458        | 715        | 487        | 426        |
|         | GG   | C        |                         | 605        | 468        | 637        | 528        | 287        |
|         | GG   | E        |                         | 369        | 252        | 318        | 425        | 334        |
|         | HH   | A        |                         | 483        | 514        | 585        | x          | x          |
|         | HH   | C        |                         | 597        | 522        | 567        | 505        | 449        |
|         | HH   | D        |                         | 574        | 509        | 622        | 522        | 565        |
|         | II   | B        |                         | 440        | 438        | 545        | 367        | 371        |
|         | II   | E        |                         | 620        | 433        | 532        | 359        | 324        |
|         | JJ   | B        |                         | x          | 627        | 574        | 613        | 475        |
|         | JJ   | E        |                         | x          | 592        | 636        | 439        | 608        |

| Tukey's multiple comparisons test | Mean Diff. | 95.00% CI of diff. | Significant? | Summary |
|-----------------------------------|------------|--------------------|--------------|---------|
| 16.                               |            |                    |              |         |
| SD vs. HF                         | -65.88     | -147.5 to 15.75    | No           | ns      |
| SD vs. HF-STZ                     | -281.9     | -363.5 to -200.2   | Yes          | ****    |
| HF vs. HF-STZ                     | -216       | -297.6 to -134.4   | Yes          | ****    |
| 20.                               |            |                    |              |         |
| SD vs. HF                         | -62.5      | -135.5 to 10.51    | No           | ns      |
| SD vs. HF-STZ                     | -290.1     | -363.1 to -217.1   | Yes          | ****    |
| HF vs. HF-STZ                     | -227.6     | -300.6 to -154.6   | Yes          | ****    |
| 24.                               |            |                    |              |         |
| SD vs. HF                         | -85.3      | -158.3 to -12.29   | Yes          | *       |
| SD vs. HF-STZ                     | -389.1     | -462.1 to -316.1   | Yes          | ****    |
| HF vs. HF-STZ                     | -303.8     | -376.8 to -230.8   | Yes          | ****    |
| 36.                               |            |                    |              |         |
| SD vs. HF                         | -30.75     | -108.2 to 46.69    | No           | ns      |
| SD vs. HF-STZ                     | -223.8     | -303.1 to -144.5   | Yes          | ****    |
| HF vs. HF-STZ                     | -193.1     | -268.1 to -118     | Yes          | ****    |

|         | Age (wk)      | 16     | 20    | 24     | 32    | 36     |
|---------|---------------|--------|-------|--------|-------|--------|
| Ctrl    | Average (g)   | 238.8  | 191.2 | 184.0  | x     | 202.8  |
|         | StDev         | 32.2   | 29.5  | 51.1   | x     | 26.0   |
|         | n             | 8      | 10    | 10     | x     | 8      |
|         | StError       | 11.4   | 9.3   | 16.2   | x     | 9.2    |
|         | Max threshold | 303.2  | 250.1 | 286.2  | x     | 254.8  |
|         | Min threshold | 174.3  | 132.3 | 81.8   | x     | 150.7  |
| DIO     | Average (g)   | 304.6  | 253.7 | 269.3  | x     | 233.5  |
|         | StDev         | 75.1   | 25.5  | 42.4   | x     | 38.5   |
|         | n             | 8      | 10    | 10     | x     | 10     |
|         | StError       | 26.562 | 8.057 | 13.416 | x     | 15.715 |
|         | Max threshold | 454.9  | 304.7 | 354.2  | x     | 310.5  |
|         | Min threshold | 154.4  | 202.7 | 184.4  | x     | 156.5  |
| DIO-STZ | Average (g)   | 520.6  | 481.3 | 573.1  | 471.7 | 426.6  |
|         | StDev         | 91.4   | 102.5 | 104.5  | 82.1  | 109.9  |
|         | n             | 8      | 10    | 10     | 9     | 7      |
|         | StError       | 32.3   | 32.4  | 33.0   | 27.4  | 41.5   |
|         | Max threshold | 703.4  | 686.2 | 782.1  | 635.9 | 646.3  |
|         | Min threshold | 337.8  | 276.4 | 364.1  | 307.5 | 206.8  |

Table S3. Plasma Insulin

| Group   | Mouse ID# | Insulin (ng/ml) |
|---------|-----------|-----------------|
| SD      | 3268      | 2.469           |
|         | 3270      | 2.320           |
|         | 3272      | 2.267           |
|         | 3273      | 0.590           |
|         | 3274      | 1.350           |
|         | 3275      | 2.569           |
|         | 3276      | 0.621           |
|         | 3277      | 2.071           |
| DIO     | 3280      | 10.440          |
|         | 3281      | 11.594          |
|         | 3282      | 8.211           |
|         | 3283      | 7.498           |
|         | 3284      | 9.827           |
|         | 3285      | 11.610          |
|         | 3286      | 0.729           |
|         | 3287      | 4.133           |
| DIO-STZ | 3288      | 1.765           |
|         | 3289      | 1.099           |
|         | 3292      | 1.356           |
|         | 3293      | 1.257           |
|         | 3294      | 1.226           |
|         | 3295      | 1.934           |
|         | 3296      | 1.478           |
|         | 3297      | 1.318           |
|         | 3290      | 1.127           |

|                                             |                    |                   |         |                  |        |
|---------------------------------------------|--------------------|-------------------|---------|------------------|--------|
| Brown-Forsythe test                         |                    |                   |         |                  |        |
| F (DFn, DFd)                                | 7.554 (2, 22)      |                   |         |                  |        |
| P value                                     | 0.0032             |                   |         |                  |        |
| P value summary                             | **                 |                   |         |                  |        |
| Are SDs significantly different (P < 0.05)? | Yes                |                   |         |                  |        |
| → log2 transform data and retest            |                    |                   |         |                  |        |
| Brown-Forsythe test                         |                    |                   |         |                  |        |
| F (DFn, DFd)                                | 1.157 (2, 22)      |                   |         |                  |        |
| P value                                     | 0.3328             |                   |         |                  |        |
| P value summary                             | ns                 |                   |         |                  |        |
| Are SDs significantly different (P < 0.05)? | No                 |                   |         |                  |        |
| → Proceed with ordinary 1-way ANOVA         |                    |                   |         |                  |        |
| Tukey's multiple comparisons test           |                    |                   |         |                  |        |
| Mean Diff.                                  | 95.00% CI of diff. | Significant?      | Summary | Adjusted P Value |        |
| SD vs. DIO                                  | -2.025             | -3.189 to -0.8605 | Yes     | ***              | 0.0007 |
| SD vs. DIO-STZ                              | 0.1804             | -0.9508 to 1.312  | No      | ns               | 0.9157 |
| DIO vs. DIO-STZ                             | 2.205              | 1.074 to 3.336    | Yes     | ***              | 0.0002 |

| Group         | SD    | DIO    | DIO-STZ |
|---------------|-------|--------|---------|
| 1             | 2.469 | 10.440 | 1.765   |
| 2             | 2.320 | 11.594 | 1.099   |
| 3             | 2.267 | 8.211  | 1.356   |
| 4             | 0.590 | 7.498  | 1.257   |
| 5             | 1.350 | 9.827  | 1.226   |
| 6             | 2.569 | 11.610 | 1.934   |
| 7             | 0.621 | 0.729  | 1.478   |
| 8             | 2.071 | 4.133  | 1.318   |
| 9             | x     | x      | 1.127   |
| Average (g)   | 1.782 | 8.005  | 1.429   |
| StDev         | 0.816 | 3.843  | 0.285   |
| n             | 8     | 8      | 9       |
| StError       | 0.288 | 1.359  | 0.095   |
| Max threshold | 3.41  | 15.69  | 2.00    |
| Min threshold | 0.15  | 0.32   | 0.86    |

Table S4.

| Animal ID | Tst Mark | BW (g) | Time (min) |     |     |     |     |      |     |     |     |     |
|-----------|----------|--------|------------|-----|-----|-----|-----|------|-----|-----|-----|-----|
|           |          |        | 0          | 15  | 30  | 60  | 120 | 180* |     |     |     |     |
|           |          |        | SD         |     |     |     |     |      |     |     |     |     |
| AA        | A        | 28     | 190        | 451 | 483 | 522 | 246 | 316  | 710 | 750 | 750 | 653 |
| AA        | R        | 38     | 177        | 473 | 390 | 441 | 292 | 327  | 591 | 715 | 750 | 581 |
| AA        | C        | 52.1   | 184        | 540 | 525 | 361 | 269 | 357  | 706 | 750 | 750 | 750 |
| AA        | D        | 29.3   | 193        | 477 | 661 | 466 | 250 | 172  | x   | x   | x   | 750 |
| AA        | F        | 31     | 185        | 546 | 711 | 479 | 236 | 114  | x   | x   | x   | 750 |
| BB        | A        | 31.5   | 222        | 507 | 281 | 241 | 162 | 152  | x   | x   | x   | 750 |
| BB        | B        | 33.3   | 197        | 446 | 376 | 323 | 238 | 210  | x   | x   | x   | 750 |
| BB        | C        | 33.6   | 205        | 610 | 401 | 294 | 216 | 298  | 375 | 622 | 710 | 472 |
| BB        | D        | 29.2   | 218        | 679 | 323 | 296 | 214 | 296  | 461 | 728 | 651 | 726 |
| BB        | F        | 29.2   | 245        | 678 | 526 | 380 | 236 | 378  | 611 | 750 | 580 | 723 |
| CC        | A        | 43     | 316        | 710 | 750 | 750 | 750 | 750  | 750 | 750 | 750 | 750 |
| CC        | C        | 50.9   | 327        | 591 | 775 | 580 | 466 | 224  | x   | x   | x   | 750 |
| CC        | E        | 51.6   | 357        | 706 | 750 | 750 | 619 | 320  | x   | x   | x   | 750 |
| DD        | A        | 56.3   | 309        | 349 | 319 | 367 | 269 | 249  | x   | x   | x   | 750 |
| DD        | C        | 43     | 286        | 750 | 750 | 750 | 750 | 750  | 750 | 750 | 750 | 750 |
| DD        | E        | 46.2   | 428        | 632 | 750 | 739 | 373 | 229  | x   | x   | x   | 750 |
| EE        | B        | 43.1   | 341        | 643 | 727 | 740 | 493 | 267  | x   | x   | x   | 750 |
| EE        | E        | 38.5   | 298        | 379 | 622 | 710 | 572 | 265  | x   | x   | x   | 750 |
| FF        | B        | 31.2   | 296        | 661 | 728 | 661 | 539 | 244  | x   | x   | x   | 750 |
| FF        | E        | 49.3   | 378        | 611 | 750 | 750 | 580 | 267  | x   | x   | x   | 750 |
| GG        | A        | 43.7   | 515        | 750 | 750 | 750 | 663 | 538  | x   | x   | x   | 750 |
| GG        | C        | 45.3   | 488        | 663 | 750 | 750 | 581 | 650  | x   | x   | x   | 750 |
| GG        | E        | 35.9   | 356        | 750 | 750 | 719 | 369 | 261  | x   | x   | x   | 750 |
| HH        | A        | 50     | 503        | 750 | 750 | 750 | 750 | 710  | x   | x   | x   | 750 |
| HH        | C        | 45.7   | 484        | 728 | 750 | 750 | 701 | 653  | x   | x   | x   | 750 |
| HH        | D        | 45.7   | 647        | 750 | 750 | 750 | 643 | 517  | x   | x   | x   | 750 |
| II        | B        | 43.4   | 423        | 750 | 750 | 750 | 689 | 611  | x   | x   | x   | 750 |
| II        | E        | 41.2   | 514        | 750 | 750 | 750 | 472 | 419  | x   | x   | x   | 750 |
| JJ        | B        | 42.8   | 719        | 750 | 750 | 750 | 706 | 620  | x   | x   | x   | 750 |
| JJ        | E        | 38.5   | 723        | 750 | 750 | 750 | 750 | 661  | x   | x   | x   | 750 |

\* An additional recording was taken at 180 min to ensure that glucose levels were returning to normal in mice with Fg > 750mg/dl.

\* Comparative statistics not performed as several recorded measures were above the level of detection (any readings >750 gave a reading of 'HI')

| ID            | Tst | SD  |     |     |     |     |     | DIO |     |     |     |     |     | DIO-5T2 |     |     |    |     |     |  |  |       |       |       |       |       |       |         |       |       |        |       |       |       |       |       |  |  |  |  |  |  |  |
|---------------|-----|-----|-----|-----|-----|-----|-----|-----|-----|-----|-----|-----|-----|---------|-----|-----|----|-----|-----|--|--|-------|-------|-------|-------|-------|-------|---------|-------|-------|--------|-------|-------|-------|-------|-------|--|--|--|--|--|--|--|
|               |     | 0   | 15  | 30  | 60  | 120 | 180 | 0   | 15  | 30  | 60  | 120 | 180 | 0       | 15  | 30  | 60 | 120 | 180 |  |  |       |       |       |       |       |       |         |       |       |        |       |       |       |       |       |  |  |  |  |  |  |  |
| 1             | A   | 190 | 451 | 483 | 522 | 246 | 316 | 710 | 750 | 750 | 565 | 515 | 750 | 750     | 750 | 653 |    |     |     |  |  |       |       |       |       |       |       |         |       |       |        |       |       |       |       |       |  |  |  |  |  |  |  |
| 2             | R   | 177 | 473 | 390 | 441 | 292 | 327 | 591 | 715 | 750 | 365 | 488 | 693 | 750     | 750 | 581 |    |     |     |  |  |       |       |       |       |       |       |         |       |       |        |       |       |       |       |       |  |  |  |  |  |  |  |
| 3             | C   | 184 | 540 | 525 | 361 | 269 | 357 | 706 | 750 | 750 | 429 | 356 | 750 | 750     | 750 | 750 |    |     |     |  |  |       |       |       |       |       |       |         |       |       |        |       |       |       |       |       |  |  |  |  |  |  |  |
| 4             | D   | 193 | 477 | 661 | 466 | 250 | 300 | x   | x   | x   | x   | 484 | 728 | 750     | 750 | 750 |    |     |     |  |  |       |       |       |       |       |       |         |       |       |        |       |       |       |       |       |  |  |  |  |  |  |  |
| 5             | F   | 185 | 546 | 711 | 479 | 236 | 236 | 296 | x   | x   | x   | x   | 728 | 750     | 750 | 750 |    |     |     |  |  |       |       |       |       |       |       |         |       |       |        |       |       |       |       |       |  |  |  |  |  |  |  |
| 6             | A   | 222 | 507 | 281 | 241 | 162 | 152 | x   | x   | x   | x   | 647 | 750 | 750     | 750 | 643 |    |     |     |  |  |       |       |       |       |       |       |         |       |       |        |       |       |       |       |       |  |  |  |  |  |  |  |
| 7             | B   | 197 | 446 | 376 | 323 | 238 | 341 | 643 | 727 | 740 | 493 | 423 | 750 | 750     | 750 | 689 |    |     |     |  |  |       |       |       |       |       |       |         |       |       |        |       |       |       |       |       |  |  |  |  |  |  |  |
| 8             | C   | 205 | 610 | 401 | 294 | 216 | 298 | 375 | 622 | 710 | 572 | 514 | 750 | 750     | 750 | 472 |    |     |     |  |  |       |       |       |       |       |       |         |       |       |        |       |       |       |       |       |  |  |  |  |  |  |  |
| 9             | D   | 218 | 679 | 323 | 296 | 214 | 296 | 461 | 728 | 651 | 539 | 719 | 750 | 750     | 750 | 726 |    |     |     |  |  |       |       |       |       |       |       |         |       |       |        |       |       |       |       |       |  |  |  |  |  |  |  |
| 10            | F   | 245 | 678 | 526 | 380 | 236 | 378 | 611 | 750 | 750 | 580 | 723 | 750 | 750     | 750 | 750 |    |     |     |  |  |       |       |       |       |       |       |         |       |       |        |       |       |       |       |       |  |  |  |  |  |  |  |
| Mean          |     |     |     |     |     |     |     |     |     |     |     |     |     |         |     |     |    |     |     |  |  | 202.6 | 540.5 | 448.1 | 377.4 | 235.9 | 334.6 | 634.625 | 724   | 710   | 513.25 | 537.2 | 739.1 | 750   | 746.9 | 633.4 |  |  |  |  |  |  |  |
| St Dev        |     |     |     |     |     |     |     |     |     |     |     |     |     |         |     |     |    |     |     |  |  | 20.4  | 88.5  | 174.3 | 92.6  | 34.8  | 42.9  | 104.7   | 43.4  | 59.1  | 96.0   | 121.5 | 27.6  | 0.0   | 9.8   | 125.9 |  |  |  |  |  |  |  |
| St error      |     |     |     |     |     |     |     |     |     |     |     |     |     |         |     |     |    |     |     |  |  | 6.4   | 27.9  | 58.0  | 32.9  | 12.3  | 13.6  | 33.1    | 13.7  | 18.7  | 30.4   | 38.4  | 8.7   | 0.0   | 3.1   | 39.9  |  |  |  |  |  |  |  |
| Max threshold |     |     |     |     |     |     |     |     |     |     |     |     |     |         |     |     |    |     |     |  |  | 243.4 | 716.7 | 796.2 | 562.5 | 305.5 | 420.3 | 826.1   | 810.9 | 826.1 | 705.2  | 780.3 | 794.3 | 750.0 | 766.5 | 885.2 |  |  |  |  |  |  |  |
| Min threshold |     |     |     |     |     |     |     |     |     |     |     |     |     |         |     |     |    |     |     |  |  | 161.8 | 364.3 | 100.0 | 192.3 | 166.3 | 248.9 | 407.2   | 637.1 | 591.9 | 321.3  | 294.1 | 683.9 | 750.0 | 727.3 | 381.6 |  |  |  |  |  |  |  |

| Time    | ID | Tst | Tukey's multiple comparisons test |                | Mean Diff      | 95.00% CI of diff | Significant? | Summary | Adjusted P Value |     |        |       |    |
|---------|----|-----|-----------------------------------|----------------|----------------|-------------------|--------------|---------|------------------|-----|--------|-------|----|
|         |    |     | SD vs DIO                         | DIO vs DIO-5T2 |                |                   |              |         |                  |     |        |       |    |
| 0 min   |    |     | SD vs DIO                         | DIO vs DIO-5T2 | -132           | -215.5 to -48.47  | Yes          | **      | <0.0001          | A,B |        |       |    |
|         |    |     | SD vs DIO-5T2                     |                | -136.6         | -318.1 to -29.13  | Yes          | ****    | <0.0001          | A,C |        |       |    |
|         |    |     | DIO vs DIO-5T2                    |                | -202.6         | -286.1 to -119.1  | Yes          | ****    | <0.0001          | B,C |        |       |    |
|         |    |     | Test details                      |                |                |                   |              |         |                  |     |        |       |    |
|         |    |     |                                   | Mean 1         | Mean 2         | Mean Diff         | SE of diff   | n1      | n2               | q   | Df     |       |    |
|         |    |     |                                   | SD vs DIO      | DIO vs DIO-5T2 | 202.6             | 334.6        | -132    | 33.69            | 10  | 10     | 5.541 | 27 |
| 15 min  |    |     | SD vs DIO                         | DIO vs DIO-5T2 | -76.13         | -168.1 to 38.46   | No           | ns      | 0.1218           | A,B |        |       |    |
|         |    |     | SD vs DIO-5T2                     |                | -198.6         | -285.9 to -111.3  | Yes          | ****    | <0.0001          | A,C |        |       |    |
|         |    |     | DIO vs DIO-5T2                    |                | -122.5         | -215.1 to -29.89  | Yes          | **      | 0.038            | B,C |        |       |    |
|         |    |     | Test details                      |                |                |                   |              |         |                  |     |        |       |    |
|         |    |     |                                   | Mean 1         | Mean 2         | Mean Diff         | SE of diff   | n1      | n2               | q   | Df     |       |    |
|         |    |     |                                   | SD vs DIO      | DIO vs DIO-5T2 | 540.5             | 636.6        | -76.13  | 37.17            | 10  | 8      | 2.896 | 25 |
| 30 min  |    |     | SD vs DIO                         | DIO vs DIO-5T2 | -275.9         | -402.2 to -149.6  | Yes          | ****    | <0.0001          | A,B |        |       |    |
|         |    |     | SD vs DIO-5T2                     |                | -301.9         | -421 to -182.8    | Yes          | ****    | <0.0001          | A,C |        |       |    |
|         |    |     | DIO vs DIO-5T2                    |                | -26            | -152.1 to 100.3   | No           | ns      | 0.8659           | B,C |        |       |    |
|         |    |     | Test details                      |                |                |                   |              |         |                  |     |        |       |    |
|         |    |     |                                   | Mean 1         | Mean 2         | Mean Diff         | SE of diff   | n1      | n2               | q   | Df     |       |    |
|         |    |     |                                   | SD vs DIO      | DIO vs DIO-5T2 | 448.1             | 724          | -275.9  | 50.73            | 10  | 8      | 7.692 | 25 |
| 60 min  |    |     | SD vs DIO                         | DIO vs DIO-5T2 | 377.4          | 746.9             | -369.5       | 28.62   | 10               | 10  | 18.26  | 25    |    |
|         |    |     | DIO vs DIO-5T2                    |                | 721            | 750               | -29          | 50.73   | 8                | 10  | 0.7289 | 25    |    |
|         |    |     | Test details                      |                |                |                   |              |         |                  |     |        |       |    |
|         |    |     |                                   | Mean 1         | Mean 2         | Mean Diff         | SE of diff   | n1      | n2               | q   | Df     |       |    |
|         |    |     |                                   | SD vs DIO      | DIO vs DIO-5T2 | 377.4             | 710          | -332.6  | 30.36            | 10  | 8      | 15.5  | 25 |
|         |    |     |                                   | SD vs DIO-5T2  |                | 377.4             | 746.9        | -369.5  | 28.62            | 10  | 10     | 18.26 | 25 |
| 120 min |    |     | SD vs DIO                         | DIO vs DIO-5T2 | 277.4          | 387.1 to 367      | Yes          | ****    | <0.0001          | A,B |        |       |    |
|         |    |     | SD vs DIO-5T2                     |                | 397.5          | 501.5 to 293.5    | Yes          | ****    | <0.0001          | A,C |        |       |    |
|         |    |     | DIO vs DIO-5T2                    |                | -20.2          | -205.5 to 95.26   | Yes          | **      | 0.0309           | B,C |        |       |    |
|         |    |     | Test details                      |                |                |                   |              |         |                  |     |        |       |    |
|         |    |     |                                   | Mean 1         | Mean 2         | Mean Diff         | SE of diff   | n1      | n2               | q   | Df     |       |    |
|         |    |     |                                   | SD vs DIO      | DIO vs DIO-5T2 | 235.9             | 513.3        | -277.4  | 44.29            | 10  | 8      | 8.855 | 25 |
|         |    |     | SD vs DIO-5T2                     |                | 235.9          | 633.4             | -397.5       | 41.76   | 10               | 10  | 13.46  | 25    |    |
|         |    |     | DIO vs DIO-5T2                    |                | 513.3          | 633.4             | -120.2       | 44.29   | 8                | 10  | 3.836  | 25    |    |

Table S5.

**24wk Insulin Tolerance Testing**

| Cage      | Mouse | BW (g) | Time (min) |     |     |     |     |     |  |
|-----------|-------|--------|------------|-----|-----|-----|-----|-----|--|
|           |       |        | 0          | 15  | 30  | 45  | 60  | 120 |  |
| <b>SD</b> |       |        |            |     |     |     |     |     |  |
| AA        | A     | 28     | 131        | 42  | x   | x   | x   |     |  |
| AA        | B     | 38     | 172        | 129 | 122 | 125 | 148 |     |  |
| AA        | C     | 32.1   | 165        | 132 | 125 | 114 | 143 |     |  |
| AA        | D     | 29.3   | 160        | 108 | 98  | 84  | 145 |     |  |
| AA        | F     | 31     | 86         | 106 | 135 | 121 | 135 |     |  |
| BB        | A     | 31.5   | 197        | 213 | 224 | 202 | 234 |     |  |
| BB        | B     | 33.3   | 249        | 133 | 142 | 147 | 167 |     |  |
| BB        | C     | 34.6   | 218        | 127 | 142 | 171 | 193 |     |  |
| BB        | D     | 29.2   | 228        | 135 | 95  | 24  | 236 |     |  |
| BB        | F     | 29.2   | 234        | 108 | 125 | 93  | 96  |     |  |
| CC        | A     | 43     | 309        | 265 | 279 | 274 | 233 |     |  |
| CC        | C     | 50.9   | 242        | 258 | 230 | 240 | 172 |     |  |
| CC        | E     | 51.6   | 283        | 383 | 376 | 299 | 262 |     |  |
| DD        | A     | 56.2   | 177        | 212 | 192 | 191 | 185 |     |  |
| DD        | C     | 43     | 241        | 263 | 268 | 228 | 251 |     |  |
| DD        | E     | 46.2   | 281        | 243 | 274 | 208 | 232 |     |  |
| EE        | B     | 43.1   | 276        | 312 | 264 | 253 | 228 |     |  |
| EE        | F     | 38.5   | 258        | 316 | 305 | 212 | 209 |     |  |
| FF        | B     | 51.2   | 302        | 295 | 260 | 234 | 239 |     |  |
| FF        | E     | 48.4   | 324        | 309 | 246 | 215 | 256 |     |  |
| GG        | A     | 43.7   | 715        | 624 | 572 | 380 | 459 |     |  |
| GG        | C     | 45.3   | 637        | 633 | 455 | 303 | 307 |     |  |
| GG        | E     | 35.9   | 318        | 304 | 377 | 162 | 136 |     |  |
| HH        | A     | 50     | 585        | 750 | 564 | 474 | 301 |     |  |
| HH        | C     | 45.7   | 567        | 588 | 449 | 262 | 346 |     |  |
| HH        | D     | 45.7   | 622        | 602 | 549 | 444 | 429 |     |  |
| II        | B     | 43.4   | 545        | 653 | 605 | 666 | 567 |     |  |
| II        | E     | 41.2   | 532        | 520 | 292 | 170 | 214 |     |  |
| II        | F     | 42.8   | 574        | 585 | 429 | 284 | 562 |     |  |
| II        | E     | 38.5   | 636        | 602 | 397 | 370 | 430 |     |  |

\* Mice that developed hypoglycemia (<50mg/dL) were resuscitated with 20% glucose solution

| n            | SD    |       |       |       |       |  | DIO   |       |       |       |       |       | DIO-STZ |       |       |       |  |  |
|--------------|-------|-------|-------|-------|-------|--|-------|-------|-------|-------|-------|-------|---------|-------|-------|-------|--|--|
|              |       |       |       |       |       |  |       |       |       |       |       |       |         |       |       |       |  |  |
| 1            | 131   | 42    | x     | x     | x     |  | 309   | 265   | 279   | 274   | 233   | 715   | 624     | 572   | 380   | 459   |  |  |
| 2            | 172   | 129   | 122   | 125   | 148   |  | 242   | 258   | 230   | 240   | 172   | 637   | 633     | 655   | 303   | 307   |  |  |
| 3            | 165   | 132   | 125   | 114   | 143   |  | 288   | 383   | 376   | 299   | 262   | 210   | 201     | 177   | 162   | 136   |  |  |
| 4            | 160   | 108   | 98    | 84    | 145   |  | 177   | 212   | 192   | 191   | 185   | 585   | 750     | 564   | 474   | 301   |  |  |
| 5            | 86    | 106   | 135   | 121   | 135   |  | 241   | 263   | 248   | 228   | 251   | 567   | 588     | 449   | 262   | 346   |  |  |
| 6            | 197   | 213   | 224   | 202   | 234   |  | 281   | 243   | 274   | 208   | 232   | 622   | 602     | 549   | 444   | 429   |  |  |
| 7            | 249   | 133   | 142   | 147   | 167   |  | 276   | 312   | 264   | 253   | 228   | 548   | 653     | 605   | 666   | 567   |  |  |
| 8            | 218   | 127   | 142   | 171   | 193   |  | 258   | 236   | 205   | 212   | 209   | 532   | 520     | 292   | 170   | 214   |  |  |
| 9            | 228   | 135   | 95    | 24    | x     |  | 302   | 295   | 260   | 234   | 239   | 574   | 585     | 429   | 284   | 502   |  |  |
| 10           | 234   | 108   | 125   | 93    | 96    |  | 324   | 309   | 246   | 215   | 256   | 636   | 602     | 397   | 370   | 430   |  |  |
| Mean         | 184   | 123.3 | 124   | 120   | 158   |  | 269   | 276   | 257   | 235   | 227   | 573   | 586     | 449   | 352   | 369   |  |  |
| St Dev       | 51.1  | 41.9  | 37.7  | 51.7  | 41.3  |  | 42.4  | 51.2  | 50.4  | 32.7  | 29.7  | 104.5 | 115.2   | 115.2 | 151.8 | 133.2 |  |  |
| St Error     | 16.2  | 13.2  | 11.9  | 16.3  | 13.1  |  | 13.4  | 16.2  | 15.9  | 10.3  | 9.4   | 33.0  | 36.4    | 42.7  | 48.0  | 42.1  |  |  |
| Max Interval | 286.2 | 207.0 | 209.6 | 223.4 | 240.3 |  | 354.2 | 378.0 | 358.2 | 280.7 | 286.2 | 782.1 | 816.5   | 719.3 | 655.1 | 635.5 |  |  |
| Min Interval | 81.8  | 39.6  | 58.9  | 16.8  | 75.0  |  | 184.4 | 173.2 | 156.6 | 170.1 | 167.2 | 364.1 | 355.7   | 178.5 | 47.9  | 102.7 |  |  |

| Time            | Test                              | Mean Diff | 95.00% CI of diff | Significant? | Summary    | Adjusted P Value | n1    | n2    | q  | DF |
|-----------------|-----------------------------------|-----------|-------------------|--------------|------------|------------------|-------|-------|----|----|
| 0 min           | Tukey's multiple comparisons test |           |                   |              |            |                  |       |       |    |    |
|                 | SD vs. DIO                        | 85.9      | 168.6 to -6.033   | Yes          | *          | 0.033            | A/B   |       |    |    |
|                 | SD vs. DIO-STZ                    | -189.1    | -468.4 to -109.8  | Yes          | ****       | <0.0001          | A/C   |       |    |    |
|                 | DIO vs. DIO-STZ                   | -302.8    | -382.1 to -224.5  | Yes          | ****       | <0.0001          | B/C   |       |    |    |
|                 | Test details                      | Mean 1    | Mean 2            | Mean Diff    | SE of diff | n1               | n2    | q     | DF |    |
|                 | SD vs. DIO                        | 184       | 269.3             | -85.3        | 31.97      | 10               | 10    | 3.773 | 27 |    |
| SD vs. DIO-STZ  | 184                               | 573.1     | -389.1            | 31.97        | 10         | 10               | 17.21 | 27    |    |    |
| DIO vs. DIO-STZ | 269.3                             | 573.1     | -303.8            | 31.97        | 10         | 10               | 13.44 | 27    |    |    |
| 15 min          | Tukey's multiple comparisons test |           |                   |              |            |                  |       |       |    |    |
|                 | SD vs. DIO                        | -152.3    | -237.3 to -67.26  | Yes          | ***        | 0.0004           | A/B   |       |    |    |
|                 | SD vs. DIO-STZ                    | -462.8    | -547.8 to -377.8  | Yes          | ****       | <0.0001          | A/C   |       |    |    |
|                 | DIO vs. DIO-STZ                   | -310.5    | -395.5 to -225.5  | Yes          | ****       | <0.0001          | B/C   |       |    |    |
|                 | Test details                      | Mean 1    | Mean 2            | Mean Diff    | SE of diff | n1               | n2    | q     | DF |    |
|                 | SD vs. DIO                        | 123.3     | 275.6             | -152.3       | 34.3       | 10               | 10    | 6.28  | 27 |    |
| SD vs. DIO-STZ  | 123.3                             | 586.1     | -462.8            | 34.3         | 10         | 10               | 19.08 | 27    |    |    |
| DIO vs. DIO-STZ | 275.6                             | 586.1     | -310.5            | 34.3         | 10         | 10               | 12.8  | 27    |    |    |
| 30 min          | Tukey's multiple comparisons test |           |                   |              |            |                  |       |       |    |    |
|                 | SD vs. DIO                        | -123.2    | -223 to -23.38    | Yes          | *          | 0.0134           | A/B   |       |    |    |
|                 | SD vs. DIO-STZ                    | -314.7    | -414.5 to -214.9  | Yes          | ****       | <0.0001          | A/C   |       |    |    |
|                 | DIO vs. DIO-STZ                   | -191.5    | -288.6 to -94.36  | Yes          | ***        | 0.0001           | B/C   |       |    |    |
|                 | Test details                      | Mean 1    | Mean 2            | Mean Diff    | SE of diff | n1               | n2    | q     | DF |    |
|                 | SD vs. DIO                        | 134.2     | 257.4             | -123.2       | 40.16      | 9                | 10    | 4.337 | 26 |    |
| SD vs. DIO-STZ  | 134.2                             | 448.9     | -314.7            | 40.16        | 9          | 10               | 11.08 | 26    |    |    |
| DIO vs. DIO-STZ | 257.4                             | 448.9     | -191.5            | 39.09        | 10         | 10               | 6.928 | 26    |    |    |
| 60 min          | Tukey's multiple comparisons test |           |                   |              |            |                  |       |       |    |    |
|                 | SD vs. DIO                        | -115.3    | -224.6 to -5.97   | Yes          | *          | 0.0173           | A/B   |       |    |    |
|                 | SD vs. DIO-STZ                    | -231.4    | -340.7 to -122.1  | Yes          | ****       | <0.0001          | A/C   |       |    |    |
|                 | DIO vs. DIO-STZ                   | -116.1    | -222.5 to -9.696  | Yes          | *          | 0.0305           | B/C   |       |    |    |
|                 | Test details                      | Mean 1    | Mean 2            | Mean Diff    | SE of diff | n1               | n2    | q     | DF |    |
|                 | SD vs. DIO                        | 120.1     | 235.4             | -115.3       | 43.99      | 9                | 10    | 3.706 | 26 |    |
| SD vs. DIO-STZ  | 120.1                             | 351.5     | -231.4            | 43.99        | 9          | 10               | 7.438 | 26    |    |    |
| DIO vs. DIO-STZ | 235.4                             | 351.5     | -116.1            | 42.82        | 10         | 10               | 3.834 | 26    |    |    |
| 120 min         | Tukey's multiple comparisons test |           |                   |              |            |                  |       |       |    |    |
|                 | SD vs. DIO                        | -69.08    | -169.2 to 31.05   | No           | ns         | 0.1182           | A/B   |       |    |    |
|                 | SD vs. DIO-STZ                    | -211.5    | -311.6 to -111.4  | Yes          | ****       | <0.0001          | A/C   |       |    |    |
|                 | DIO vs. DIO-STZ                   | -142.4    | -236.8 to -48     | Yes          | **         | 0.0026           | B/C   |       |    |    |
|                 | Test details                      | Mean 1    | Mean 2            | Mean Diff    | SE of diff | n1               | n2    | q     | DF |    |
|                 | SD vs. DIO                        | 157.6     | 226.7             | -69.08       | 40.2       | 8                | 10    | 2.43  | 25 |    |
| SD vs. DIO-STZ  | 157.6                             | 369.1     | -211.5            | 40.2         | 8          | 10               | 7.44  | 25    |    |    |
| DIO vs. DIO-STZ | 226.7                             | 369.1     | -142.4            | 37.9         | 10         | 10               | 5.314 | 25    |    |    |

Table S6. Plasma Cholesterol

| Group   | Mouse ID# | Cholesterol (mg/dL) |
|---------|-----------|---------------------|
| SD      | 3268      | 125.356             |
|         | 3270      | 169.516             |
|         | 3272      | 103.989             |
|         | 3274      | 135.328             |
|         | 3275      | 169.516             |
|         | 3276      | 133.903             |
| DIO     | 3280      | 226.496             |
|         | 3281      | 327.635             |
|         | 3282      | 242.165             |
|         | 3283      | 213.675             |
|         | 3284      | 195.157             |
|         | 3285      | 192.308             |
| DIO-STZ | 3288      | 233.618             |
|         | 3290      | 139.601             |
|         | 3292      | 202.279             |
|         | 3294      | 198.006             |
|         | 3295      | 207.977             |
|         | 3296      | 215.100             |

| Brown-Forsythe test                         |            |                    |              |         |                  |
|---------------------------------------------|------------|--------------------|--------------|---------|------------------|
| F (DFn, DFd)                                |            | 0.4761 (2, 15)     |              |         |                  |
| P value                                     |            | 0.6303             |              |         |                  |
| P value summary                             |            | ns                 |              |         |                  |
| Are SDs significantly different (P < 0.05)? |            | No                 |              |         |                  |
| → Proceed with ordinary 1-way ANOVA         |            |                    |              |         |                  |
| Tukey's multiple comparisons test           |            |                    |              |         |                  |
|                                             | Mean Diff. | 95.00% CI of diff. | Significant? | Summary | Adjusted P Value |
| SD vs. DIO                                  | -93.3      | -149.3 to -37.28   | Yes          | **      | 0.0016           |
| SD vs. DIO-STZ                              | -59.83     | -115.9 to -3.808   | Yes          | *       | 0.0357           |
| DIO vs. DIO-STZ                             | 33.48      | -22.55 to 89.5     | No           | ns      | 0.296            |

| Group         | SD      | DIO     | DIO-STZ |
|---------------|---------|---------|---------|
| 1             | 125.356 | 226.496 | 233.618 |
| 2             | 169.516 | 327.635 | 139.601 |
| 3             | 103.989 | 242.165 | 202.279 |
| 4             | 135.328 | 213.675 | 198.006 |
| 5             | 169.516 | 195.157 | 207.977 |
| 6             | 133.903 | 192.308 | 215.100 |
| Average (g)   | 139.601 | 232.906 | 199.430 |
| StDev         | 25.736  | 50.087  | 31.866  |
| n             | 6       | 6       | 6       |
| StError       | 10.507  | 20.448  | 13.009  |
| Max threshold | 191.07  | 333.08  | 263.16  |
| Min threshold | 88.13   | 132.73  | 135.70  |

Disease Models & Mechanisms: doi:10.1242/dmm.037374: Supplementary information

Table S7. *FPIC Cholesterol*

| Fraction | SD     |        |        |          |        |        | DIO    |          |        |        |        |          | DIO-STZ |        |        |          |        |          |       |
|----------|--------|--------|--------|----------|--------|--------|--------|----------|--------|--------|--------|----------|---------|--------|--------|----------|--------|----------|-------|
|          | Mean   | StDev  | n      | StdError | Mean   | StDev  | n      | StdError | Mean   | StDev  | n      | StdError | Mean    | StDev  | n      | StdError |        |          |       |
| 1        | 0.22   | 0.216  | 0.073  | 0        | 0      | 0      | 0.224  | 0.076    | 0.149  | 0      | 0      | 0.073    | 0       | 0      | 0      | 0.08     | 0      |          |       |
| 2        | 0      | 0.144  | 0      | 0        | 0      | 0.075  | 0.076  | 0.074    | 0      | 0      | 0.073  | 0.075    | 0       | 0      | 0      | 0.08     | 0      |          |       |
| 3        | 0      | 0      | 0.146  | 0        | 0.073  | 0.075  | 0      | 0        | 0.076  | 0.15   | 0      | 0.075    | 0       | 0      | 0      | 0.077    | 0      |          |       |
| 4        | 0      | 0.144  | 0.146  | 0        | 0.147  | 0.15   | 0      | 0.076    | 0.074  | 0.076  | 0.075  | 0        | 0.451   | 0      | 0.075  | 0        | 0.077  |          |       |
| 5        | 0.22   | 0.144  | 0.51   | 0.292    | 0.147  | 0.224  | 0      | 0.076    | 0      | 0.076  | 0.075  | 0.145    | 0.15    | 0      | 0      | 0        | 0.077  |          |       |
| 6        | 0.073  | 0      | 0.219  | 0.073    | 0.147  | 0.15   | 0      | 0.076    | 0      | 0.076  | 0.075  | 0.508    | 0.075   | 0      | 0.075  | 0        | 0.154  |          |       |
| 7        | 0.147  | 0.072  | 0.073  | 0.219    | 0      | 0.075  | 0.075  | 0.076    | 0.074  | 0      | 0      | 0        | 0       | 0      | 0      | 0        | 0.462  |          |       |
| 8        | 0.073  | 0.072  | 0.073  | 0.146    | 0      | 0      | 0.075  | 0.076    | 0.074  | 0      | 0      | 0        | 0.075   | 0      | 0      | 0.08     | 0      |          |       |
| 9        | 0.073  | 0.216  | 0.073  | 0        | 0      | 0.224  | 0.152  | 0.074    | 0.076  | 0.075  | 0      | 0.075    | 0       | 0.075  | 0      | 0.075    | 0.398  |          |       |
| 10       | 0      | 0.072  | 0.146  | 0        | 0      | 0      | 0.076  | 0.146    | 0.076  | 0.075  | 0      | 0.075    | 0.078   | 0.08   | 0      | 0.077    | 0      |          |       |
| 11       | 0      | 0      | 0.146  | 0        | 0.22   | 0.15   | 0      | 0.227    | 0.074  | 0.076  | 0.075  | 0        | 0.075   | 0.075  | 0      | 0.231    | 0      |          |       |
| 12       | 0      | 0.144  | 0.292  | 0.146    | 0.147  | 0.15   | 0.075  | 0.682    | 0.074  | 0.227  | 0.15   | 0.073    | 0.226   | 0      | 0.301  | 0.313    | 0      | 0.693    |       |
| 13       | 0.147  | 0.144  | 0.219  | 0.219    | 0.22   | 0.15   | 0.149  | 0.985    | 0.074  | 0.302  | 0.15   | 0.073    | 0.376   | 0      | 0.301  | 0.391    | 0      | 0.616    |       |
| 14       | 0.294  | 0.289  | 0.292  | 0.292    | 0.293  | 0.374  | 0.671  | 1.667    | 0.223  | 0.529  | 0.301  | 0.145    | 0.677   | 0      | 0.602  | 0.705    | 0.161  | 0.924    |       |
| 15       | 0.881  | 0.722  | 0.437  | 0.585    | 0.513  | 0.524  | 0.97   | 2.728    | 0.744  | 0.907  | 0.451  | 0.29     | 1.053   | 0.227  | 0.752  | 1.018    | 0.562  | 1.386    |       |
| 16       | 1.396  | 1.01   | 0.729  | 1.242    | 0.879  | 0.748  | 1.641  | 4.168    | 0.967  | 1.361  | 0.677  | 0.508    | 1.579   | 0.531  | 1.353  | 1.644    | 1.445  | 2.002    |       |
| 17       | 1.763  | 1.443  | 1.02   | 1.515    | 1.245  | 1.047  | 2.163  | 5.902    | 1.414  | 2.192  | 0.977  | 0.653    | 2.18    | 0.896  | 1.805  | 2.192    | 1.445  | 2.618    |       |
| 18       | 1.91   | 1.732  | 1.312  | 1.535    | 1.612  | 1.496  | 2.686  | 6.911    | 1.86   | 3.175  | 1.429  | 1.015    | 3.308   | 0.909  | 2.481  | 2.896    | 1.926  | 3.851    |       |
| 19       | 1.983  | 2.02   | 1.458  | 1.973    | 2.198  | 1.87   | 3.655  | 7.351    | 3.125  | 4.233  | 2.105  | 2.03     | 4.361   | 1.516  | 3.308  | 3.757    | 2.408  | 5.391    |       |
| 20       | 2.057  | 2.597  | 1.458  | 2.338    | 2.93   | 2.244  | 5.073  | 9.473    | 4.762  | 5.896  | 3.308  | 2.538    | 5.865   | 2.425  | 5.038  | 4.149    | 3.531  | 7.162    |       |
| 21       | 1.983  | 3.03   | 1.312  | 2.631    | 3.297  | 2.393  | 6.789  | 11.898   | 6.473  | 8.163  | 4.887  | 3.771    | 7.669   | 3.41   | 6.391  | 5.245    | 5.056  | 8.086    |       |
| 22       | 2.35   | 3.896  | 1.312  | 2.996    | 4.249  | 2.767  | 9.026  | 14.778   | 8.929  | 10.431 | 6.541  | 5.076    | 9.248   | 4.396  | 8.045  | 6.106    | 6.742  | 9.472    |       |
| 23       | 2.718  | 4.545  | 1.166  | 2.996    | 4.762  | 3.067  | 10.593 | 16.521   | 10.417 | 12.018 | 8.12   | 6.019    | 10.15   | 4.926  | 8.947  | 6.967    | 7.945  | 10.089   |       |
| 24       | 3.158  | 5.195  | 1.166  | 3.581    | 4.967  | 3.411  | 11.936 | 20.037   | 11.979 | 11.943 | 9.474  | 6.526    | 10.602  | 5.532  | 10.15  | 7.436    | 9.47   | 10.32    |       |
| 25       | 3.085  | 5.483  | 1.29   | 2.923    | 4.982  | 3.141  | 11.712 | 17.507   | 11.756 | 11.338 | 9.474  | 7.107    | 10.451  | 4.85   | 9.925  | 7.906    | 8.909  | 9.950001 |       |
| 26       | 2.864  | 5.916  | 1.312  | 2.85     | 5.275  | 3.366  | 11.115 | 15.915   | 10.938 | 10.506 | 9.699  | 7.034    | 10.827  | 4.471  | 10.226 | 7.828    | 8.587  | 8.625    |       |
| 27       | 3.158  | 7.143  | 1.749  | 3.215    | 5.861  | 3.366  | 11.637 | 14.627   | 11.756 | 10.355 | 10.075 | 7.252    | 11.128  | 4.623  | 10.827 | 8.376    | 9.23   | 8.394    |       |
| 28       | 4.113  | 9.38   | 2.697  | 4.019    | 7.253  | 4.338  | 12.383 | 14.703   | 12.426 | 11.111 | 11.203 | 8.484    | 11.729  | 5.836  | 12.03  | 9.159    | 11.316 | 10.012   |       |
| 29       | 6.023  | 11.111 | 4.738  | 6.284    | 9.597  | 6.657  | 12.682 | 14.551   | 13.69  | 12.32  | 11.955 | 9.5      | 12.18   | 8.867  | 13.233 | 10.411   | 12.681 | 11.783   |       |
| 30       | 7.418  | 12.049 | 7.289  | 8.696    | 11.429 | 9.349  | 13.428 | 15.081   | 15.402 | 13.379 | 12.857 | 10.587   | 13.308  | 11.292 | 14.662 | 11.507   | 14.928 | 13.323   |       |
| 31       | 8.961  | 13.781 | 9.548  | 10.888   | 13.7   | 12.042 | 16.561 | 18.568   | 20.015 | 15.571 | 16.466 | 11.82    | 15.038  | 15.46  | 18.722 | 13.351   | 18.539 | 16.25    |       |
| 32       | 12.707 | 17.027 | 13.921 | 16.588   | 19.388 | 17.053 | 23.275 | 25.085   | 26.339 | 18.821 | 22.707 | 13.27    | 17.669  | 23.191 | 23.947 | 16.204   | 25.003 | 20.87    |       |
| 33       | 17.113 | 19.841 | 20.117 | 20.168   | 22.418 | 22.289 | 28.497 | 28.799   | 30.06  | 18.443 | 24.887 | 13.488   | 20      | 25.692 | 25.564 | 17.691   | 26.726 | 24.182   |       |
| 34       | 17.407 | 18.831 | 20.845 | 20.022   | 19.78  | 20.942 | 25.289 | 28.753   | 23.958 | 20.257 | 21.654 | 17.331   | 21.353  | 20.235 | 20.301 | 19.178   | 19.502 | 19.715   |       |
| 35       | 10.87  | 11.111 | 13.557 | 11.911   | 11.282 | 12.191 | 14.472 | 14.551   | 14.724 | 10.506 | 11.579 | 10.95    | 11.729  | 9.994  | 10.226 | 10.568   | 9.631  | 9.935    |       |
| 36       | 4.48   | 4.69   | 5.831  | 4.384    | 4.542  | 4.862  | 5.446  | 5.457    | 4.241  | 3.704  | 4.286  | 4.061    | 10.376  | 3.107  | 3.985  | 3.914    | 3.21   | 3.774    |       |
| 37       | 1.396  | 1.515  | 1.968  | 1.388    | 1.392  | 1.496  | 1.492  | 1.592    | 1.265  | 1.285  | 1.429  | 1.378    | 1.429   | 0.909  | 1.353  | 1.331    | 0.803  | 1.309    |       |
| 38       | 0.441  | 0.577  | 0.656  | 0.731    | 0.513  | 0.524  | 0.522  | 0.682    | 0.521  | 0.454  | 0.526  | 0.508    | 0.526   | 0.303  | 0.602  | 0.47     | 0.321  | 0.231    |       |
| 39       | 0.073  | 0.216  | 0.292  | 0.146    | 0.22   | 0.224  | 0.149  | 0.227    | 0.149  | 0.168  | 0.451  | 0.363    | 0.376   | 0.152  | 0.376  | 0.107    | 0      | 0.385    |       |
| 40       | 0.734  | 0.649  | 0.219  | 1.023    | 0.293  | 0.299  | 1.119  | 0.682    | 0.818  | 0.227  | 0.526  | 0.218    | 0.226   | 0.758  | 0.451  | 0.235    | 1.284  | 0.385    |       |
| 41       | 0.367  | 0.505  | 0.146  | 0.219    | 0.147  | 0.15   | 0.522  | 0.379    | 0.446  | 0.227  | 0.226  | 0.29     | 0.226   | 0.227  | 0.301  | 0.548    | 0.321  | 0.308    |       |
| 42       | 0      | 0.072  | 0.146  | 0        | 0.147  | 0.15   | 0      | 0.076    | 0.074  | 0.151  | 0.226  | 0.145    | 0.15    | 0      | 0.15   | 0.078    | 0      | 0.231    |       |
| 43       | 0      | 0.289  | 0.292  | 0.073    | 0.22   | 0.15   | 0      | 0.076    | 0.074  | 0.076  | 0.226  | 0.073    | 0.075   | 0      | 0.15   | 0.078    | 0      | 0.231    |       |
| 44       | 0      | 0.072  | 0.219  | 0        | 0.22   | 0.075  | 0      | 0        | 0      | 0.076  | 0.075  | 0.073    | 0.075   | 0      | 0.075  | 0.078    | 0      | 0.154    |       |
| 45       | 0      | 0.072  | 0.219  | 0        | 0.147  | 0.15   | 0      | 0.076    | 0      | 0.076  | 0.15   | 0.073    | 0.075   | 0      | 0.15   | 0.078    | 0      | 0.154    |       |
| 46       | 0      | 0.144  | 0.146  | 0.292    | 0.147  | 0.15   | 0      | 0.076    | 0.074  | 0.076  | 0.15   | 0.079    | 0.075   | 0      | 0.075  | 0.078    | 0      | 0.077    |       |
| 47       | 0      | 0      | 0.073  | 0        | 0      | 0      | 0      | 0        | 0.076  | 0.075  | 0      | 0.075    | 0       | 0.075  | 0      | 0.075    | 0      | 0.077    |       |
| 48       | 0.808  | 0.505  | 0.073  | 1.096    | 0.147  | 0.15   | 1.194  | 0.682    | 0.818  | 0      | 0.301  | 0        | 0       | 0.758  | 0.226  | 0        | 0      | 0.120    |       |
| 49       | 0.073  | 0.144  | 0      | 0.073    | 0      | 0      | 0.224  | 0.076    | 0.149  | 0      | 0.15   | 0        | 0       | 0      | 0      | 0        | 0      | 0        | 0     |
| 50       | 0      | 0      | 0.073  | 0        | 0      | 0      | 0      | 0        | 0      | 0.076  | 0.075  | 0        | 0       | 0      | 0.075  | 0        | 0      | 0        | 0.077 |

| Fraction | SD    |       |   |          | DIO    |       |   |          | DIO-STZ |       |   |          |
|----------|-------|-------|---|----------|--------|-------|---|----------|---------|-------|---|----------|
|          | Mean  | StDev | n | StdError | Mean   | StDev | n | StdError | Mean    | StDev | n | StdError |
| 1        | 0.085 | 0.107 | 6 | 0.044    | 0.087  | 0.087 | 6 | 0.036    | 0.013   | 0.033 | 6 | 0.013    |
| 2        | 0.024 | 0.059 | 6 | 0.024    | 0.050  | 0.038 | 6 | 0.016    | 0.028   | 0.040 | 6 | 0.016    |
| 3        | 0.049 | 0.061 | 6 | 0.024    | 0.038  | 0.061 | 6 | 0.016    | 0.038   | 0.041 | 6 | 0.017    |
| 4        | 0.098 | 0.076 | 6 | 0.031    | 0.050  | 0.039 | 6 | 0.016    | 0.101   | 0.176 | 6 | 0.072    |
| 5        | 0.256 | 0.136 | 6 | 0.056    | 0.062  | 0.055 | 6 | 0.022    | 0.038   | 0.063 | 6 | 0.026    |
| 6        | 0.110 | 0.077 | 6 | 0.031    | 0.123  | 0.192 | 6 | 0.079    | 0.051   | 0.063 | 6 | 0.026    |
| 7        | 0.098 | 0.075 | 6 | 0.031    | 0.038  | 0.041 | 6 | 0.017    | 0.077   | 0.189 | 6 | 0.077    |
| 8        | 0.061 | 0.055 | 6 | 0.022    | 0.038  | 0.041 | 6 | 0.017    | 0.026   | 0.040 | 6 | 0.016    |
| 9        | 0.060 | 0.084 | 6 | 0.034    | 0.100  | 0.077 | 6 | 0.032    | 0.076   | 0.119 | 6 | 0.049    |
| 10       | 0.049 | 0.061 | 6 | 0.024    | 0.038  | 0.041 | 6 | 0.017    | 0.038   | 0.049 | 6 | 0.017    |
| 11       | 0.096 | 0.098 | 6 | 0.040    | 0.075  | 0.083 | 6 | 0.040    | 0.090   | 0.091 | 6 | 0.037    |
| 12       | 0.147 | 0.092 | 6 | 0.038    | 0.214  | 0.238 | 6 | 0.097    | 0.256   | 0.256 | 6 | 0.105    |
| 13       | 0.183 | 0.040 | 6 | 0.016    | 0.289  | 0.351 | 6 | 0.143    | 0.281   | 0.242 | 6 | 0.099    |
| 14       | 0.306 | 0.034 | 6 | 0.014    | 0.589  | 0.563 | 6 | 0.230    | 0.512   | 0.354 | 6 | 0.145    |
| 15       | 0.610 | 0.163 | 6 | 0.067    | 1.015  | 0.879 | 6 | 0.359    | 0.833   | 0.409 | 6 | 0.167    |
| 16       | 1.001 | 0.271 | 6 | 0.111    | 1.554  | 1.348 | 6 | 0.550    | 1.426   | 0.492 | 6 | 0.201    |
| 17       | 1.306 | 0.276 | 6 | 0.113    | 2.067  | 1.565 | 6 | 0.639    | 1.808   | 0.710 | 6 | 0.290    |
| 18       | 1.600 | 0.206 | 6 | 0.084    | 2.679  | 1.772 | 6 | 0.884    | 2.562   | 1.046 | 6 | 0.427    |
| 19       | 1.917 | 0.249 | 6 | 0.102    | 3.750  | 1.963 | 6 | 0.801    | 3.457   | 1.381 | 6 | 0.564    |
| 20       | 2.271 | 0.501 | 6 | 0.204    | 5.175  | 2.434 | 6 | 0.994    | 4.695   | 1.696 | 6 | 0.692    |
| 21       | 2.441 | 0.721 | 6 | 0.295    | 6.997  | 2.848 | 6 | 1.163    | 5.976   | 1.758 | 6 | 0.718    |
| 22       | 2.928 | 1.064 | 6 | 0.434    | 9.130  | 3.370 | 6 | 1.376    | 7.335   | 1.961 | 6 | 0.801    |
| 23       | 3.209 | 1.317 | 6 | 0.538    | 10.615 | 3.584 | 6 | 1.463    | 8.171   | 2.011 | 6 | 0.821    |
| 24       | 3.537 | 1.467 | 6 | 0.599    | 11.649 | 3.796 | 6 | 1.550    | 8.918   | 2.014 | 6 | 0.822    |
| 25       | 3.846 | 1.541 | 6 | 0.629    | 11.    |       |   |          |         |       |   |          |

**Table S8. Cholesterol - vLDL**

| Group   | Mouse ID# | vLDL Cholesterol (mg/dL) |
|---------|-----------|--------------------------|
| SD      | 3268      | 0.820                    |
|         | 3270      | 1.230                    |
|         | 3272      | 1.627                    |
|         | 3274      | 0.850                    |
|         | 3275      | 0.897                    |
|         | 3276      | 0.905                    |
| DIO     | 3280      | 0.682                    |
|         | 3281      | 1.726                    |
|         | 3282      | 0.652                    |
|         | 3283      | 0.729                    |
|         | 3284      | 0.697                    |
|         | 3285      | 1.090                    |
| DIO-STZ | 3288      | 1.390                    |
|         | 3290      | 0.000                    |
|         | 3292      | 0.668                    |
|         | 3294      | 0.595                    |
|         | 3295      | 0.313                    |
|         | 3296      | 2.143                    |

| Brown-Forsythe test                         |  |               |                    |              |         |                  |
|---------------------------------------------|--|---------------|--------------------|--------------|---------|------------------|
| F (DFn, DFd)                                |  | 1.159 (2, 15) |                    |              |         |                  |
| P value                                     |  | 0.3405        |                    |              |         |                  |
| P value summary                             |  | ns            |                    |              |         |                  |
| Are SDs significantly different (P < 0.05)? |  | No            |                    |              |         |                  |
| → Proceed with ordinary 1-way ANOVA         |  |               |                    |              |         |                  |
| Tukey's multiple comparisons test           |  | Mean Diff.    | 95.00% CI of diff. | Significant? | Summary | Adjusted P Value |
| SD vs. DIO                                  |  | 0.1256        | -0.6928 to 0.944   | No           | ns      | 0.9166           |
| SD vs. DIO-STZ                              |  | 0.2032        | -0.6152 to 1.022   | No           | ns      | 0.7979           |
| DIO vs. DIO-STZ                             |  | 0.0776        | -0.7408 to 0.896   | No           | ns      | 0.9672           |

| Group         | SD    | DIO   | DIO-STZ |
|---------------|-------|-------|---------|
| 1             | 0.820 | 0.682 | 1.390   |
| 2             | 1.230 | 1.726 | 0.000   |
| 3             | 1.627 | 0.652 | 0.668   |
| 4             | 0.850 | 0.729 | 0.595   |
| 5             | 0.897 | 0.697 | 0.313   |
| 6             | 0.905 | 1.090 | 2.143   |
| Average (g)   | 1.055 | 0.929 | 0.852   |
| StDev         | 0.317 | 0.423 | 0.784   |
| n             | 6     | 6     | 6       |
| StError       | 0.129 | 0.173 | 0.320   |
| Max threshold | 1.69  | 1.77  | 2.42    |
| Min threshold | 0.42  | 0.08  | -0.72   |



**Table S9. Cholesterol - LDL**

| Group   | Mouse ID# | LDL Cholesterol (mg/dL) |
|---------|-----------|-------------------------|
| SD      | 3268      | 26.979                  |
|         | 3270      | 38.145                  |
|         | 3272      | 12.389                  |
|         | 3274      | 26.640                  |
|         | 3275      | 38.193                  |
|         | 3276      | 24.498                  |
| DIO     | 3280      | 71.453                  |
|         | 3281      | 136.626                 |
|         | 3282      | 71.737                  |
|         | 3283      | 79.992                  |
|         | 3284      | 53.370                  |
|         | 3285      | 53.570                  |
| DIO-STZ | 3288      | 80.446                  |
|         | 3290      | 28.719                  |
|         | 3292      | 61.613                  |
|         | 3294      | 63.280                  |
|         | 3295      | 56.814                  |
|         | 3296      | 76.700                  |

|                                             |                |
|---------------------------------------------|----------------|
| Brown-Forsythe test                         |                |
| F (DFn, DFd)                                | 0.7793 (2, 15) |
| P value                                     | 0.4764         |
| P value summary                             | ns             |
| Are SDs significantly different (P < 0.05)? | No             |
| → Proceed with ordinary 1-way ANOVA         |                |

| Tukey's multiple comparisons test | Mean Diff. | 95.00% CI of diff. | Significant? | Summary | Adjusted P Value |
|-----------------------------------|------------|--------------------|--------------|---------|------------------|
| SD vs. DIO                        | -49.98     | -82.1 to -17.86    | Yes          | **      | 0.0029           |
| SD vs. DIO-STZ                    | -33.45     | -65.57 to -1.335   | Yes          | *       | 0.0407           |
| DIO vs. DIO-STZ                   | 16.53      | -15.59 to 48.65    | No           | ns      | 0.3976           |

| Group         | SD     | DIO     | DIO-STZ |
|---------------|--------|---------|---------|
| 1             | 26.979 | 71.453  | 80.446  |
| 2             | 38.145 | 136.626 | 28.719  |
| 3             | 12.389 | 71.737  | 61.613  |
| 4             | 26.640 | 79.992  | 63.280  |
| 5             | 38.193 | 53.370  | 56.814  |
| 6             | 24.498 | 53.570  | 76.700  |
| Average (g)   | 27.807 | 77.791  | 61.262  |
| StDev         | 9.649  | 30.745  | 18.382  |
| n             | 6      | 6       | 6       |
| StError       | 3.939  | 12.552  | 7.504   |
| Max threshold | 47.10  | 139.28  | 98.03   |
| Min threshold | 8.51   | 16.30   | 24.50   |

**Table S10. Cholesterol - HDL**

| Group   | Mouse ID# | HDL Cholesterol (mg/dL) |
|---------|-----------|-------------------------|
| SD      | 3268      | 97.557                  |
|         | 3270      | 130.141                 |
|         | 3272      | 89.973                  |
|         | 3274      | 107.837                 |
|         | 3275      | 130.425                 |
|         | 3276      | 108.501                 |
| DIO     | 3280      | 154.361                 |
|         | 3281      | 189.283                 |
|         | 3282      | 169.777                 |
|         | 3283      | 132.955                 |
|         | 3284      | 141.090                 |
|         | 3285      | 137.648                 |
| DIO-STZ | 3288      | 151.782                 |
|         | 3290      | 110.883                 |
|         | 3292      | 139.998                 |
|         | 3294      | 134.130                 |
|         | 3295      | 150.850                 |
|         | 3296      | 136.257                 |

|                                             |            |                    |              |         |                  |
|---------------------------------------------|------------|--------------------|--------------|---------|------------------|
| Brown-Forsythe test                         |            |                    |              |         |                  |
| F (DFn, DFd)                                |            |                    |              |         | 0.7793 (2, 15)   |
| P value                                     |            |                    |              |         | 0.4764           |
| P value summary                             |            |                    |              |         | ns               |
| Are SDs significantly different (P < 0.05)? |            |                    |              |         | No               |
| → Proceed with ordinary 1-way ANOVA         |            |                    |              |         |                  |
| Tukey's multiple comparisons test           |            |                    |              |         |                  |
|                                             | Mean Diff. | 95.00% CI of diff. | Significant? | Summary | Adjusted P Value |
| SD vs. DIO                                  | -43.45     | -70.45 to -16.45   | Yes          | **      | 0.0022           |
| SD vs. DIO-STZ                              | -26.58     | -53.58 to 0.4235   | No           | ns      | 0.054            |
| DIO vs. DIO-STZ                             | 16.87      | -10.13 to 43.87    | No           | ns      | 0.2669           |

| Group         | SD      | DIO     | DIO-STZ |
|---------------|---------|---------|---------|
| 1             | 97.557  | 154.361 | 151.782 |
| 2             | 130.141 | 189.283 | 110.883 |
| 3             | 89.973  | 169.777 | 139.998 |
| 4             | 107.837 | 132.955 | 134.130 |
| 5             | 130.425 | 141.090 | 150.850 |
| 6             | 108.501 | 137.648 | 136.257 |
| Average (g)   | 110.739 | 154.186 | 137.317 |
| StDev         | 16.628  | 21.775  | 14.897  |
| n             | 6       | 6       | 6       |
| StError       | 6.788   | 8.889   | 6.082   |
| Max threshold | 143.99  | 197.73  | 167.11  |
| Min threshold | 77.48   | 110.64  | 107.52  |

Table S11. *Plasma oxLDL*

| Group   | Mouse ID# | oxLDL (ng/dL) |
|---------|-----------|---------------|
| SD      | 3268      | 15.64         |
|         | 3270      | 15.34         |
|         | 3272      | 16.24         |
|         | 3273      | 7.94          |
|         | 3274      | 28.64         |
|         | 3275      | 25.44         |
|         | 3276      | 18.04         |
| DIO     | 3280      | 39.24         |
|         | 3281      | 40.74         |
|         | 3282      | 44.74         |
|         | 3283      | 35.14         |
|         | 3284      | 43.14         |
|         | 3285      | 47.74         |
| DIO-STZ | 3288      | 55.64         |
|         | 3290      | 67.94         |
|         | 3292      | 62.54         |
|         | 3294      | 56.04         |
|         | 3295      | 55.74         |
|         | 3296      | 64.84         |

| Brown-Forsythe test                         |                |
|---------------------------------------------|----------------|
| F (DFn, DFd)                                | 0.2649 (2, 16) |
| P value                                     | 0.7706         |
| P value summary                             | ns             |
| Are SDs significantly different (P < 0.05)? | No             |
| → Proceed with ordinary 1-way ANOVA         |                |

| Tukey's multiple comparisons test | Mean Diff. | 95.00% CI of diff. | Significant? | Summary | Adjusted P Value |
|-----------------------------------|------------|--------------------|--------------|---------|------------------|
| SD vs. DIO                        | -23.61     | -31.85 to -15.36   | Yes          | ****    | <0.0001          |
| SD vs. DIO-STZ                    | -42.27     | -50.52 to -34.03   | Yes          | ****    | <0.0001          |
| DIO vs. DIO-STZ                   | -18.67     | -27.22 to -10.11   | Yes          | ***     | 0.0001           |

| Group         | SD     | DIO    | DIO-STZ |
|---------------|--------|--------|---------|
| 1             | 15.64  | 39.24  | 55.640  |
| 2             | 15.34  | 40.74  | 67.940  |
| 3             | 16.24  | 44.74  | 62.540  |
| 4             | 7.94   | 35.14  | 56.040  |
| 5             | 28.64  | 43.14  | 55.740  |
| 6             | 25.44  | 47.74  | 64.840  |
| 7             | 18.04  | x      | x       |
| Average (g)   | 18.183 | 41.790 | 60.457  |
| StDev         | 6.895  | 4.422  | 5.376   |
| n             | 7      | 6      | 6       |
| StError       | 2.606  | 1.805  | 2.195   |
| Max threshold | 31.97  | 50.63  | 71.21   |
| Min threshold | 4.39   | 32.95  | 49.70   |

Table S12. Motor NCV

| Group   | Cage | Mouse ID | Motor NCV (m/s) |      |      |      |
|---------|------|----------|-----------------|------|------|------|
|         |      |          | 16wk            | 24wk | 36wk |      |
| SD      | AA   | 3268     | 62.0            | 66.0 | 62.5 |      |
|         | AA   | 3269     | 64.0            | 64.7 | 60.0 |      |
|         | AA   | 3270     | 58.0            | 60.7 | 60.0 |      |
|         | AA   | 3271     | 64.5            | 64.0 | 60.7 |      |
|         | AA   | 3272     | 59.6            | 62.0 | 59.6 |      |
|         | BB   | 3273     | 60.0            | 62.7 | 56.1 |      |
|         | BB   | 3274     | 62.5            | 64.0 | 61.5 |      |
|         | BB   | 3275     | 63.2            | 62.7 | 60.0 |      |
|         | BB   | 3276     | 60.0            | 65.1 | 58.8 |      |
|         | BB   | 3277     | 63.2            | 62.0 | 60.0 |      |
|         | DIO  | CC       | 3278            | x    | 47.4 | 46.6 |
|         |      | CC       | 3279            | 51.7 | 49.1 | 47.5 |
| CC      |      | 3280     | 51.6            | 51.6 | 50.0 |      |
| DD      |      | 3281     | 59.6            | 46.9 | 48.3 |      |
| DD      |      | 3282     | 51.7            | 45.7 | 44.2 |      |
| DD      |      | 3283     | 48.3            | 50   | 49.1 |      |
| EE      |      | 3284     | 49.1            | 45.5 | 50.0 |      |
| EE      |      | 3285     | 53.3            | 44.2 | 49.1 |      |
| FF      |      | 3286     | 52.5            | 50.8 | 50.0 |      |
| FF      |      | 3287     | 51.6            | 46.6 | 43.4 |      |
| GG      |      | 3288     | 48.3            | 53.3 | 51.9 |      |
| GG      |      | 3289     | 51.6            | 44.2 | 44.2 |      |
| DIO-STZ | GG   | 3290     | 50              | 46   | 48.3 |      |
|         | HH   | 3291     | 53.3            | 44.4 | x    |      |
|         | HH   | 3292     | 54.2            | 48.3 | 46.6 |      |
|         | HH   | 3293     | 50              | 47.5 | 46.8 |      |
|         | II   | 3294     | 52              | 47.6 | 49.2 |      |
|         | II   | 3295     | 50              | 52.5 | 49.1 |      |
|         | JJ   | 3296     | x               | 49.1 | 45.0 |      |
|         | JJ   | 3297     | x               | 51.6 | 50.0 |      |

|         | Age (wk)      | 16wk  | 24wk  | 36wk  |
|---------|---------------|-------|-------|-------|
| SD      | Average (g)   | 61.7  | 63.4  | 59.9  |
|         | StDev         | 2.166 | 1.641 | 1.691 |
|         | n             | 10    | 10    | 10    |
|         | StError       | 0.685 | 0.519 | 0.535 |
|         | Max threshold | 66.0  | 66.7  | 63.3  |
|         | Min threshold | 57.4  | 60.1  | 56.5  |
| DIO     | Average (g)   | 52.2  | 47.8  | 47.8  |
|         | StDev         | 3.2   | 2.5   | 2.4   |
|         | n             | 9     | 10    | 10    |
|         | StError       | 1.068 | 0.782 | 0.760 |
|         | Max threshold | 58.6  | 52.7  | 52.6  |
|         | Min threshold | 45.7  | 42.8  | 43.0  |
| DIO-STZ | Average (g)   | 51.2  | 48.5  | 47.9  |
|         | StDev         | 2.0   | 3.2   | 2.5   |
|         | n             | 8     | 10    | 9     |
|         | StError       | 0.7   | 1.0   | 0.8   |
|         | Max threshold | 55.1  | 54.9  | 52.8  |
|         | Min threshold | 47.3  | 42.0  | 43.0  |

|                 |                                             |                      |                  |
|-----------------|---------------------------------------------|----------------------|------------------|
| 16wk            | Brown-Forsythe test                         |                      |                  |
|                 | F (DFn, DFd)                                | 0.8018 (2, 23)       |                  |
|                 | P value                                     | 0.4607               |                  |
|                 | P value summary                             | ns                   |                  |
|                 | Are SDs significantly different (P < 0.05)? | No                   |                  |
|                 | → Proceed with ordinary 1-way ANOVA         |                      |                  |
|                 |                                             |                      |                  |
|                 | Tukey's multiple comparisons test           |                      |                  |
|                 | Mean Diff.                                  | 95.00% CI of diff.   |                  |
|                 | SD vs. DIO                                  | 10.48 8.139 to 12.81 |                  |
| SD vs. DIO-STZ  | 10.53 8.189 to 12.86                        |                      |                  |
| DIO vs. DIO-STZ | 0.05 -2.412 to 2.512                        |                      |                  |
|                 | Significant?                                | Summary              | Adjusted P Value |
|                 | Yes                                         | ****                 | <0.0001          |
|                 | Yes                                         | ****                 | <0.0001          |
|                 | No                                          | ns                   | 0.9986           |

|                 |                                             |                      |                  |
|-----------------|---------------------------------------------|----------------------|------------------|
| 24wk            | Brown-Forsythe test                         |                      |                  |
|                 | F (DFn, DFd)                                | 1.562 (2, 27)        |                  |
|                 | P value                                     | 0.2282               |                  |
|                 | P value summary                             | ns                   |                  |
|                 | Are SDs significantly different (P < 0.05)? | No                   |                  |
|                 | → Proceed with ordinary 1-way ANOVA         |                      |                  |
|                 |                                             |                      |                  |
|                 | Tukey's multiple comparisons test           |                      |                  |
|                 | Mean Diff.                                  | 95.00% CI of diff.   |                  |
|                 | SD vs. DIO                                  | 15.61 12.81 to 18.41 |                  |
| SD vs. DIO-STZ  | 14.94 12.14 to 17.74                        |                      |                  |
| DIO vs. DIO-STZ | -0.67 -3.466 to 2.126                       |                      |                  |
|                 | Significant?                                | Summary              | Adjusted P Value |
|                 | Yes                                         | ****                 | <0.0001          |
|                 | Yes                                         | ****                 | <0.0001          |
|                 | No                                          | ns                   | 0.8244           |

|                 |                                             |                      |                  |
|-----------------|---------------------------------------------|----------------------|------------------|
| 36wk            | Brown-Forsythe test                         |                      |                  |
|                 | F (DFn, DFd)                                | 2.229 (2, 25)        |                  |
|                 | P value                                     | 0.1286               |                  |
|                 | P value summary                             | ns                   |                  |
|                 | Are SDs significantly different (P < 0.05)? | No                   |                  |
|                 | → Proceed with ordinary 1-way ANOVA         |                      |                  |
|                 |                                             |                      |                  |
|                 | Tukey's multiple comparisons test           |                      |                  |
|                 | Mean Diff.                                  | 95.00% CI of diff.   |                  |
|                 | SD vs. DIO                                  | 12.52 10.12 to 14.93 |                  |
| SD vs. DIO-STZ  | 12.44 9.979 to 14.91                        |                      |                  |
| DIO vs. DIO-STZ | -0.08 -2.483 to 2.323                       |                      |                  |
|                 | Significant?                                | Summary              | Adjusted P Value |
|                 | Yes                                         | ****                 | <0.0001          |
|                 | Yes                                         | ****                 | <0.0001          |
|                 | No                                          | ns                   | 0.9962           |

Table S13. *Sensory NCV*

| Group   | Cage | Mouse ID | Sensory NCV (m/s) |      |      |
|---------|------|----------|-------------------|------|------|
|         |      |          | 16wk              | 24wk | 36wk |
| SD      | AA   | 3268     | 23.3              | 23.3 | 22.5 |
|         | AA   | 3269     | 23.3              | 22.5 | 22.5 |
|         | AA   | 3270     | 24.1              | 25   | 25.8 |
|         | AA   | 3271     | 23.3              | 23.7 | 22.5 |
|         | AA   | 3272     | 23                | 23.3 | 23.5 |
|         | BB   | 3273     | 23.3              | 23.3 | 23.3 |
|         | BB   | 3274     | 23.3              | 22.5 | 23.3 |
|         | BB   | 3275     | 20                | 24.1 | 22.5 |
|         | BB   | 3276     | 22.5              | 23.3 | 23.3 |
|         | BB   | 3277     | 23.3              | 25.8 | 23.3 |
| DIO     | CC   | 3278     | x                 | 18.4 | 18.9 |
|         | CC   | 3279     | 20                | 15   | 17.5 |
|         | CC   | 3280     | 19.3              | 20.5 | 17.9 |
|         | DD   | 3281     | 19.3              | 15.3 | 18.4 |
|         | DD   | 3282     | 19.3              | 15   | 16.6 |
|         | DD   | 3283     | 18.9              | 16.6 | 17.0 |
|         | EE   | 3284     | 17.5              | 18.1 | 17.0 |
|         | EE   | 3285     | 17.5              | 17   | 17.5 |
|         | FF   | 3286     | 17.1              | 16.2 | 18.4 |
|         | FF   | 3287     | 17.5              | 16.2 | 17.1 |
| DIO-STZ | GG   | 3288     | 17.5              | 17   | 17.5 |
|         | GG   | 3289     | 17.5              | 17.5 | 18.9 |
|         | GG   | 3290     | 17                | 17.5 | 17.0 |
|         | HH   | 3291     | 17.5              | 15.9 | x    |
|         | HH   | 3292     | 17.5              | 14   | 21.8 |
|         | HH   | 3293     | 19.3              | 17.5 | 17.0 |
|         | II   | 3294     | 19                | 17   | 17.5 |
|         | II   | 3295     | 19                | 17.9 | 17.9 |
|         | JJ   | 3296     | x                 | 16.6 | 16.6 |
|         | JJ   | 3297     | x                 | 17.5 | 17.5 |

|         | Age (wk)      | 16wk  | 24wk  | 36wk  |
|---------|---------------|-------|-------|-------|
| SD      | Average (g)   | 22.9  | 23.7  | 23.3  |
|         | StDev         | 1.104 | 1.042 | 0.990 |
|         | n             | 10    | 10    | 10    |
|         | StError       | 0.349 | 0.330 | 0.313 |
|         | Max threshold | 25.1  | 25.8  | 25.2  |
|         | Min threshold | 20.7  | 21.6  | 21.3  |
| DIO     | Average (g)   | 18.5  | 16.8  | 17.6  |
|         | StDev         | 1.1   | 1.7   | 0.7   |
|         | n             | 9     | 10    | 10    |
|         | StError       | 0.359 | 0.552 | 0.237 |
|         | Max threshold | 20.6  | 20.3  | 19.1  |
|         | Min threshold | 16.3  | 13.3  | 16.1  |
| DIO-STZ | Average (g)   | 18.0  | 16.8  | 18.0  |
|         | StDev         | 0.9   | 1.2   | 1.6   |
|         | n             | 8     | 10    | 9     |
|         | StError       | 0.3   | 0.4   | 0.5   |
|         | Max threshold | 19.8  | 19.1  | 21.1  |
|         | Min threshold | 16.2  | 14.5  | 14.8  |

|                 |                                             |                    |                |         |                  |         |
|-----------------|---------------------------------------------|--------------------|----------------|---------|------------------|---------|
| 16wk            | Brown-Forsythe test                         |                    |                |         |                  |         |
|                 | F (DFn, DFd)                                | 0.544 (2, 24)      |                |         |                  |         |
|                 | P value                                     | 0.5874             |                |         |                  |         |
|                 | P value summary                             | ns                 |                |         |                  |         |
|                 | Are SDs significantly different (P < 0.05)? | No                 |                |         |                  |         |
|                 | → Proceed with ordinary 1-way ANOVA         |                    |                |         |                  |         |
|                 | Tukey's multiple comparisons test           |                    |                |         |                  |         |
|                 | Mean Diff.                                  | 95.00% CI of diff. | Significant?   | Summary | Adjusted P Value |         |
|                 | SD vs. DIO                                  | 4.451              | 3.258 to 5.644 | Yes     | ****             | <0.0001 |
|                 | SD vs. DIO-STZ                              | 4.903              | 3.671 to 6.134 | Yes     | ****             | <0.0001 |
| DIO vs. DIO-STZ | 0.4514                                      | -0.81 to 1.713     | No             | ns      | 0.6494           |         |

|                 |                                             |                    |                |         |                  |         |
|-----------------|---------------------------------------------|--------------------|----------------|---------|------------------|---------|
| 24wk            | Brown-Forsythe test                         |                    |                |         |                  |         |
|                 | F (DFn, DFd)                                | 0.239 (2, 26)      |                |         |                  |         |
|                 | P value                                     | 0.7892             |                |         |                  |         |
|                 | P value summary                             | ns                 |                |         |                  |         |
|                 | Are SDs significantly different (P < 0.05)? | No                 |                |         |                  |         |
|                 | → Proceed with ordinary 1-way ANOVA         |                    |                |         |                  |         |
|                 | Tukey's multiple comparisons test           |                    |                |         |                  |         |
|                 | Mean Diff.                                  | 95.00% CI of diff. | Significant?   | Summary | Adjusted P Value |         |
|                 | SD vs. DIO                                  | 7.258              | 5.948 to 8.567 | Yes     | ****             | <0.0001 |
|                 | SD vs. DIO-STZ                              | 6.84               | 5.566 to 8.114 | Yes     | ****             | <0.0001 |
| DIO vs. DIO-STZ | -0.4178                                     | -1.727 to 0.8916   | No             | ns      | 0.7107           |         |

|                 |                                             |                    |                |         |                  |         |
|-----------------|---------------------------------------------|--------------------|----------------|---------|------------------|---------|
| 36wk            | Brown-Forsythe test                         |                    |                |         |                  |         |
|                 | F (DFn, DFd)                                | 0.5478 (2, 24)     |                |         |                  |         |
|                 | P value                                     | 0.5853             |                |         |                  |         |
|                 | P value summary                             | ns                 |                |         |                  |         |
|                 | Are SDs significantly different (P < 0.05)? | No                 |                |         |                  |         |
|                 | → Proceed with ordinary 1-way ANOVA         |                    |                |         |                  |         |
|                 | Tukey's multiple comparisons test           |                    |                |         |                  |         |
|                 | Mean Diff.                                  | 95.00% CI of diff. | Significant?   | Summary | Adjusted P Value |         |
|                 | SD vs. DIO                                  | 5.337              | 4.593 to 6.08  | Yes     | ****             | <0.0001 |
|                 | SD vs. DIO-STZ                              | 5.479              | 4.693 to 6.265 | Yes     | ****             | <0.0001 |
| DIO vs. DIO-STZ | 0.1425                                      | -0.6248 to 0.9098  | No             | ns      | 0.8887           |         |

Table S14. Hindpaw Latency

| Group   | Cage | Mouse ID | Hindpaw latency (s) |      |      |
|---------|------|----------|---------------------|------|------|
|         |      |          | 16wk                | 24wk | 36wk |
| SD      | AA   | 3268     | 3.64                | 2.87 | 3.86 |
|         | AA   | 3269     | 3.03                | 3.13 | 3.66 |
|         | AA   | 3270     | 3.18                | 2.94 | 4.23 |
|         | AA   | 3271     | 3.86                | 3.60 | x    |
|         | AA   | 3272     | 3.74                | 2.93 | x    |
|         | BB   | 3273     | 3.02                | x    | 3.53 |
|         | BB   | 3274     | 3.32                | 3.14 | 3.70 |
|         | BB   | 3275     | 3.18                | 3.28 | 3.78 |
|         | BB   | 3276     | 3.63                | 2.62 | 3.71 |
|         | BB   | 3277     | 3.74                | 3.09 | 3.69 |
| DIO     | CC   | 3278     | 3.35                | 4.54 | 4.73 |
|         | CC   | 3279     | 3.48                | 4.44 | 4.92 |
|         | CC   | 3280     | 3.66                | 4.76 | 3.94 |
|         | DD   | 3281     | 3.60                | 4.89 | 4.47 |
|         | DD   | 3282     | 4.22                | 3.87 | 4.38 |
|         | DD   | 3283     | 4.12                | 4.91 | 5.28 |
|         | EE   | 3284     | 3.32                | 4.53 | 4.91 |
|         | EE   | 3285     | 2.86                | 3.60 | 3.89 |
| DIO-STZ | FF   | 3286     | 2.92                | 3.99 | 5.22 |
|         | FF   | 3287     | 3.15                | 5.00 | 4.55 |
|         | GG   | 3288     | 3.52                | 4.38 | 4.98 |
|         | GG   | 3289     | 2.72                | 3.65 | 4.57 |
|         | GG   | 3290     | 3.52                | 4.58 | 4.53 |
|         | HH   | 3291     | 3.60                | 4.42 | 6.40 |
|         | HH   | 3292     | 3.47                | 4.26 | 4.26 |
|         | HH   | 3293     | 3.09                | 4.28 | x    |
|         | II   | 3294     | 2.69                | 4.07 | 5.55 |
|         | II   | 3295     | 2.66                | 4.21 | 4.52 |
| JJ      | 3296 | 2.87     | 3.46                | 4.57 |      |
| JJ      | 3297 | 2.74     | 3.91                | 4.62 |      |

|               | Age (wk)      | 16wk  | 24wk  | 36wk  |
|---------------|---------------|-------|-------|-------|
| SD            | Average (g)   | 3.4   | 3.1   | 3.8   |
|               | StDev         | 0.322 | 0.278 | 0.209 |
|               | n             | 10    | 9     | 8     |
|               | StError       | 0.102 | 0.093 | 0.074 |
|               | Max threshold | 4.1   | 3.62  | 4.19  |
|               | Min threshold | 2.8   | 2.5   | 3.4   |
|               | Average (g)   | 3.5   | 4.5   | 4.6   |
| DIO           | StDev         | 0.5   | 0.5   | 0.5   |
|               | n             | 10    | 10    | 10    |
|               | StError       | 0.151 | 0.153 | 0.151 |
|               | Max threshold | 4.4   | 5.4   | 5.6   |
|               | Min threshold | 2.6   | 3.5   | 3.7   |
| DIO-STZ       | Average (g)   | 3.1   | 4.1   | 4.9   |
|               | StDev         | 0.4   | 0.4   | 0.7   |
|               | n             | 10    | 10    | 9     |
|               | StError       | 0.1   | 0.1   | 0.2   |
|               | Max threshold | 3.9   | 4.8   | 6.2   |
| Min threshold | 2.3           | 3.41  | 3.5   |       |

|      |                                             |  |                |                    |              |         |                  |
|------|---------------------------------------------|--|----------------|--------------------|--------------|---------|------------------|
| 16wk | Brown-Forsythe test                         |  |                |                    |              |         |                  |
|      | F (DFn, DFd)                                |  | 0.3192 (2, 27) |                    |              |         |                  |
|      | P value                                     |  | 0.7294         |                    |              |         |                  |
|      | P value summary                             |  | ns             |                    |              |         |                  |
|      | Are SDs significantly different (P < 0.05)? |  | No             |                    |              |         |                  |
|      | → Proceed with ordinary 1-way ANOVA         |  |                |                    |              |         |                  |
|      | Tukey's multiple comparisons test           |  | Mean Diff.     | 95.00% CI of diff. | Significant? | Summary | Adjusted P Value |
|      | SD vs. DIO                                  |  | -0.034         | -0.4716 to 0.4036  | No           | ns      | 0.9798           |
|      | SD vs. DIO-STZ                              |  | 0.346          | -0.0916 to 0.7836  | No           | ns      | 0.1416           |
|      | DIO vs. DIO-STZ                             |  | 0.38           | -0.0576 to 0.8176  | No           | ns      | 0.098            |

|      |                                             |  |               |                    |              |         |                  |
|------|---------------------------------------------|--|---------------|--------------------|--------------|---------|------------------|
| 24wk | Brown-Forsythe test                         |  |               |                    |              |         |                  |
|      | F (DFn, DFd)                                |  | 1.091 (2, 26) |                    |              |         |                  |
|      | P value                                     |  | 0.3508        |                    |              |         |                  |
|      | P value summary                             |  | ns            |                    |              |         |                  |
|      | Are SDs significantly different (P < 0.05)? |  | No            |                    |              |         |                  |
|      | → Proceed with ordinary 1-way ANOVA         |  |               |                    |              |         |                  |
|      | Tukey's multiple comparisons test           |  | Mean Diff.    | 95.00% CI of diff. | Significant? | Summary | Adjusted P Value |
|      | SD vs. DIO                                  |  | -1.386        | -1.825 to -0.947   | Yes          | ****    | <0.0001          |
|      | SD vs. DIO-STZ                              |  | -1.055        | -1.493 to -0.6158  | Yes          | ****    | <0.0001          |
|      | DIO vs. DIO-STZ                             |  | 0.3312        | -0.0959 to 0.7583  | No           | ns      | 0.1513           |

|      |                                             |  |               |                    |              |         |                  |
|------|---------------------------------------------|--|---------------|--------------------|--------------|---------|------------------|
| 36wk | Brown-Forsythe test                         |  |               |                    |              |         |                  |
|      | F (DFn, DFd)                                |  | 3.207 (2, 22) |                    |              |         |                  |
|      | P value                                     |  | 0.0599        |                    |              |         |                  |
|      | P value summary                             |  | ns            |                    |              |         |                  |
|      | Are SDs significantly different (P < 0.05)? |  | No            |                    |              |         |                  |
|      | → Proceed with ordinary 1-way ANOVA         |  |               |                    |              |         |                  |
|      | Tukey's multiple comparisons test           |  | Mean Diff.    | 95.00% CI of diff. | Significant? | Summary | Adjusted P Value |
|      | SD vs. DIO                                  |  | -0.9231       | -1.396 to -0.4498  | Yes          | ***     | 0.0002           |
|      | SD vs. DIO-STZ                              |  | -0.9957       | -1.493 to -0.4986  | Yes          | ***     | 0.0001           |
|      | DIO vs. DIO-STZ                             |  | -0.07254      | -0.5281 to 0.383   | No           | ns      | 0.9159           |

Table S15. Intraepidermal Nerve Fiber Density

| Group   | Cage | Mouse ID | IENF (mm <sup>2</sup> ) |
|---------|------|----------|-------------------------|
|         |      |          | 36wk                    |
| SD      | AA   | 3268     | 49.01                   |
|         | AA   | 3269     | 48.25                   |
|         | AA   | 3270     | x                       |
|         | AA   | 3271     | x                       |
|         | AA   | 3272     | 51.13                   |
|         | BB   | 3273     | 63.17                   |
|         | BB   | 3274     | 55.09                   |
|         | BB   | 3275     | 50.61                   |
|         | BB   | 3276     | 55.54                   |
| DIO     | CC   | 3278     | 40.45                   |
|         | CC   | 3279     | 40.70                   |
|         | CC   | 3280     | x                       |
|         | DD   | 3281     | 40.44                   |
|         | DD   | 3282     | 49.72                   |
|         | DD   | 3283     | 43.60                   |
|         | EE   | 3284     | 39.53                   |
|         | EE   | 3285     | 34.43                   |
|         | FF   | 3286     | 54.13                   |
| DIO-STZ | GG   | 3288     | 35.02                   |
|         | GG   | 3289     | 31.08                   |
|         | GG   | 3290     | 38.64                   |
|         | HH   | 3291     | x                       |
|         | HH   | 3292     | 37.32                   |
|         | HH   | 3293     | 46.50                   |
|         | II   | 3294     | 35.79                   |
|         | II   | 3295     | 44.31                   |
|         | JJ   | 3296     | 41.24                   |
| JJ      | 3297 | 43.75    |                         |

|                                             |                 |                    |              |         |
|---------------------------------------------|-----------------|--------------------|--------------|---------|
| Brown-Forsythe test                         |                 |                    |              |         |
| F (DFn, DFd)                                | 0.09764 (2, 23) |                    |              |         |
| P value                                     | 0.9074          |                    |              |         |
| P value summary                             | ns              |                    |              |         |
| Are SDs significantly different (P < 0.05)? | No              |                    |              |         |
| → Proceed with ordinary 1-way ANOVA         |                 |                    |              |         |
|                                             |                 |                    |              |         |
| Tukey's multiple comparisons test           |                 |                    |              |         |
|                                             | Mean Diff.      | 95.00% CI of diff. | Significant? | Summary |
| SD vs. DIO                                  | 11.59           | 4.835 to 18.34     | Yes          | ***     |
| SD vs. DIO-STZ                              | 15.07           | 8.324 to 21.83     | Yes          | ****    |
| DIO vs. DIO-STZ                             | 3.488           | -3.061 to 10.04    | No           | ns      |

|         | Age (wk)      | 36wk  |
|---------|---------------|-------|
| SD      | Average (g)   | 54.4  |
|         | StDev         | 5.743 |
|         | n             | 8     |
|         | StError       | 2.031 |
|         | Max threshold | 65.9  |
|         | Min threshold | 42.9  |
| DIO     | Average (g)   | 42.8  |
|         | StDev         | 5.9   |
|         | n             | 9     |
|         | StError       | 1.950 |
|         | Max threshold | 54.5  |
|         | Min threshold | 31.1  |
| DIO-STZ | Average (g)   | 39.3  |
|         | StDev         | 5.0   |
|         | n             | 9     |
|         | StError       | 1.7   |
|         | Max threshold | 49.4  |
|         | Min threshold | 29.2  |
